# Supplementary material for: Antibacterial Meroterpenoids, Merochlorins G–J from the Marine Bacterium Streptomyces sp
Source: MDPI journal article supplement (doi:10.3390/md19110618), 2021-10-30
Supplement: s1 [file s1]

*Supporting Information for*

## **Antibacterial Meroterpenoids, Merochlorins G–J from the Marine Bacterium**

***Streptomyces* sp.**

*Min-Ji Ryu*<sup>1</sup>, *Prima F. Hillman*<sup>1</sup>, *Jihye Lee*<sup>1,2</sup>, *Sunghoon Hwang*<sup>3</sup>, *Eun-Young Lee*<sup>1</sup>, *Sun-Shin Cha*<sup>1</sup>, *Inho Yang*<sup>4</sup>, *Dong-Chan Oh*<sup>3</sup>, *Sang-Jip*

*Nam*<sup>1,\*</sup>, and *William Fenical*<sup>5,\*</sup>

<sup>1</sup>Department of Chemistry and Nanoscience, Ewha Womans University, Seoul 03760, Korea

<sup>2</sup>Laboratories of Marine New Drugs, REDONE Seoul, Seoul 08594, Korea

<sup>3</sup>Natural Products Research Institute, College of Pharmacy, Seoul National University, Seoul 08826, Korea

<sup>4</sup>Department of Convergence Study on the Ocean Science and Technology, Korea Maritime and Ocean University, Busan 49112, Korea

<sup>5</sup>Center for Marine Biotechnology and Biomedicine, Scripps Institution of Oceanography, University of California San Diego, La Jolla,

CA 92093-0204, USA

## Table of Contents

|                                                                                                          |            |
|----------------------------------------------------------------------------------------------------------|------------|
| <b>Figure S1.</b> $^1\text{H}$ NMR spectrum of Merochlorin G ( <b>1</b> ) in $\text{CDCl}_3$ .....       | <b>S5</b>  |
| <b>Figure S2.</b> $^{13}\text{C}$ NMR Spectrum of Merochlorin G ( <b>1</b> ) in $\text{CDCl}_3$ .....    | <b>S6</b>  |
| <b>Figure S3.</b> COSY Spectrum of Merochlorin G ( <b>1</b> ) in $\text{CDCl}_3$ .....                   | <b>S7</b>  |
| <b>Figure S4.</b> HSQC Spectrum of Merochlorin G ( <b>1</b> ) in $\text{CDCl}_3$ .....                   | <b>S8</b>  |
| <b>Figure S5.</b> HMBC Spectrum of Merochlorin G ( <b>1</b> ) in $\text{CDCl}_3$ .....                   | <b>S9</b>  |
| <b>Figure S6.</b> NOESY Spectrum of Merochlorin G ( <b>1</b> ) in $\text{CDCl}_3$ .....                  | <b>S10</b> |
| <b>Figure S7.</b> $^1\text{H}$ NMR Spectrum of Merochlorin H ( <b>2</b> ) in $\text{DMSO}-d_6$ .....     | <b>S11</b> |
| <b>Figure S8.</b> $^{13}\text{C}$ NMR Spectrum of Merochlorin H ( <b>2</b> ) in $\text{DMSO}-d_6$ .....  | <b>S12</b> |
| <b>Figure S9.</b> $^1\text{H}$ NMR Spectrum of Merochlorin I ( <b>3</b> ) in $\text{DMSO}-d_6$ .....     | <b>S13</b> |
| <b>Figure S10.</b> $^{13}\text{C}$ NMR Spectrum of Merochlorin I ( <b>3</b> ) in $\text{DMSO}-d_6$ ..... | <b>S14</b> |
| <b>Figure S11.</b> $^1\text{H}$ NMR Spectrum of Merochlorin J ( <b>4</b> ) in $\text{DMSO}-d_6$ .....    | <b>S15</b> |
| <b>Figure S12.</b> $^{13}\text{C}$ NMR Spectrum of Merochlorin J ( <b>4</b> ) in $\text{DMSO}-d_6$ ..... | <b>S16</b> |
| <b>Figure S13.</b> COSY Spectrum of Merochlorin J ( <b>4</b> ) in $\text{DMSO}-d_6$ .....                | <b>S17</b> |
| <b>Figure S14.</b> HSQC Spectrum of Merochlorin J ( <b>4</b> ) in $\text{DMSO}-d_6$ .....                | <b>S18</b> |
| <b>Figure S15.</b> HMBC Spectrum of Meroindenon J ( <b>4</b> ) in $\text{DMSO}-d_6$ .....                | <b>S19</b> |
| <b>Figure S16.</b> NOESY Spectrum of Meroindenon J ( <b>4</b> ) in $\text{DMSO}-d_6$ .....               | <b>S20</b> |

|                                                                                                                 |            |
|-----------------------------------------------------------------------------------------------------------------|------------|
| <b>Figure S17.</b> $^1\text{H}$ NMR Spectrum of Compound <b>10</b> in $\text{DMSO-}d_6$ .....                   | <b>S21</b> |
| <b>Figure S18.</b> $^{13}\text{C}$ NMR Spectrum of Compound <b>10</b> in $\text{DMSO-}d_6$ .....                | <b>S22</b> |
| <b>Figure S19.</b> COSY Spectrum of Compound <b>10</b> in $\text{DMSO-}d_6$ .....                               | <b>S23</b> |
| <b>Figure S20.</b> HSQC Spectrum of Compound <b>10</b> in $\text{DMSO-}d_6$ .....                               | <b>S24</b> |
| <b>Figure S21.</b> HMBC Spectrum of Compound <b>10</b> in $\text{DMSO-}d_6$ .....                               | <b>S25</b> |
| <b>Figure S22.</b> DP4 analysis of NMR calculation of Merochlorin G ( <b>1</b> ) .....                          | <b>S26</b> |
| <b>Figure S23.</b> DP4 analysis of NMR calculation of Merochlorin J ( <b>4</b> ) .....                          | <b>S27</b> |
| <b>Figure S24.</b> LRMS spectra of Merochlorins G ( <b>1</b> ) .....                                            | <b>S28</b> |
| <b>Figure S25.</b> LRMS spectrum of Merochlorin H ( <b>2</b> ) .....                                            | <b>S29</b> |
| <b>Figure S26.</b> LRMS spectrum of Merochlorin I ( <b>3</b> ) .....                                            | <b>S30</b> |
| <b>Figure S27.</b> LRMS spectrum of Merochlorin J ( <b>4</b> ) .....                                            | <b>S31</b> |
| <b>Figure S28.</b> HRMS spectrum of Merochlorin G ( <b>1</b> ) .....                                            | <b>S32</b> |
| <b>Figure S29.</b> HRMS spectrum of Merochlorin H ( <b>2</b> ) .....                                            | <b>S33</b> |
| <b>Figure S30.</b> HRMS spectrum of Merochlorin I ( <b>3</b> ) .....                                            | <b>S34</b> |
| <b>Figure S31.</b> HRMS spectrum of Merochlorin J ( <b>4</b> ) .....                                            | <b>S35</b> |
| <b>Figure S32.</b> HRMS spectrum of Compound <b>10</b> .....                                                    | <b>S36</b> |
| <b>Figure S33.</b> Simulated conformer models of two possible diastereomers of <b>1</b> ( $18R$ , $18S$ ) ..... | <b>S37</b> |

|                                                                                                                                                                                                                 |               |
|-----------------------------------------------------------------------------------------------------------------------------------------------------------------------------------------------------------------|---------------|
| <b>Figure S34.</b> Simulated conformer models of four possible diastereomers of <b>4</b> (15 <i>R</i> /18 <i>R</i> , 15 <i>R</i> /18 <i>S</i> , 15 <i>S</i> /18 <i>R</i> , and 15 <i>S</i> /18 <i>S</i> ) ..... | <b>S37-38</b> |
| <b>Table S1.</b> Experimental (Exp.) and calculated (Cal.) chemical shift values (CS, $\delta$ ) of merochlorin G ( <b>1</b> ) .....                                                                            | <b>S39-40</b> |
| <b>Table S2.</b> Experimental (Exp.) and calculated (Cal.) chemical shift values (CS, $\delta$ ) of merochlorin J ( <b>4</b> ) .....                                                                            | <b>S40-42</b> |

**Figure S1.**  $^1\text{H}$  NMR Spectrum of Merochlorin G (**1**) in  $\text{CDCl}_3$

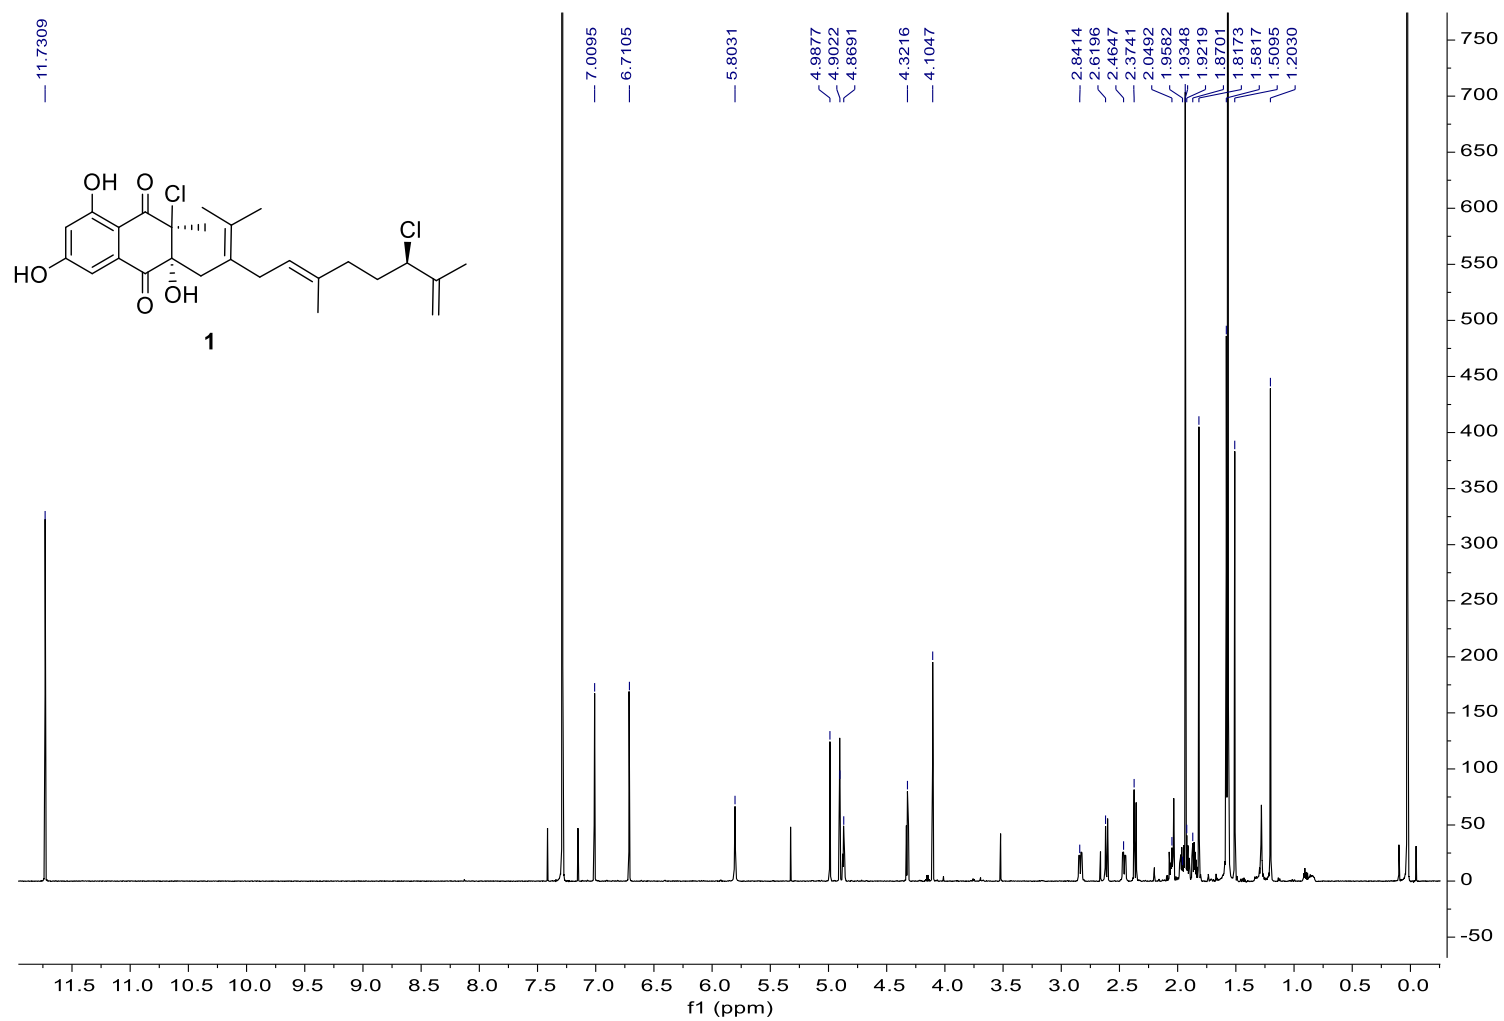

**Figure S2.**  $^{13}\text{C}$  NMR Spectrum of Merochlorin G (**1**) in  $\text{CDCl}_3$

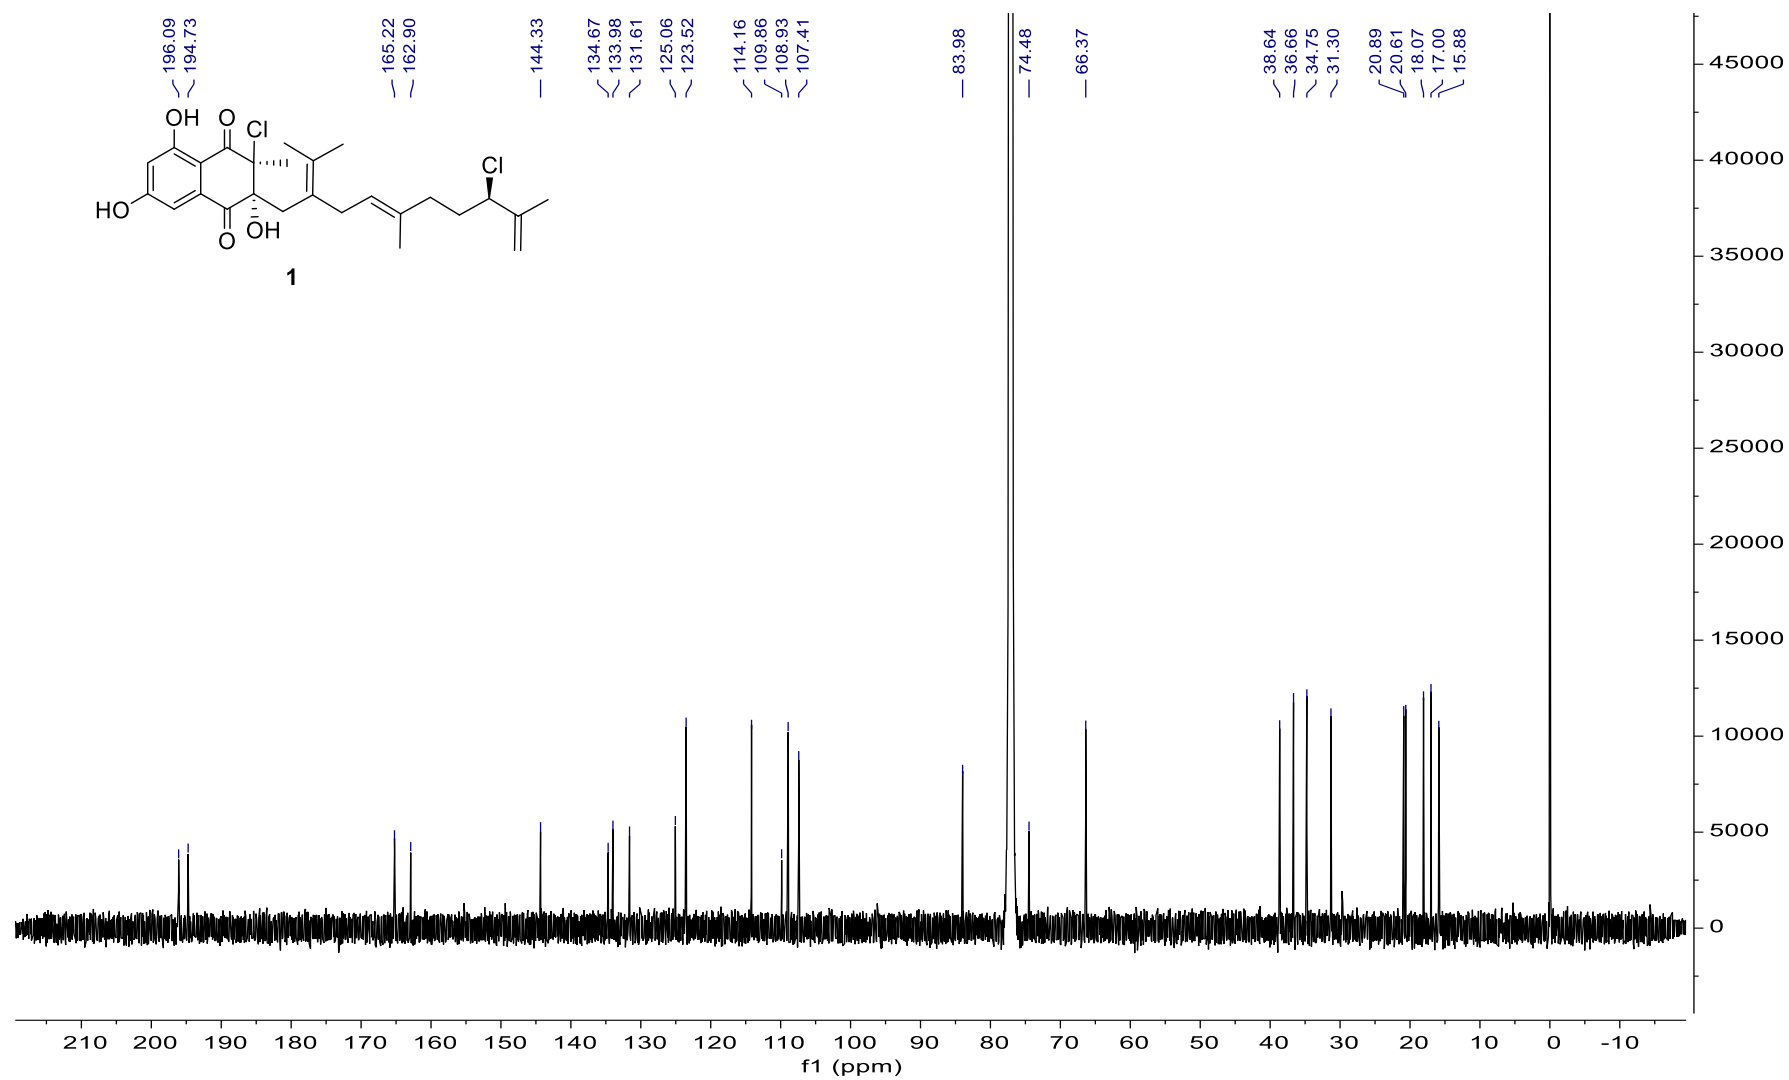

**Figure S3.** COSY Spectrum of Merochlorin G (**1**) in CDCl<sub>3</sub>

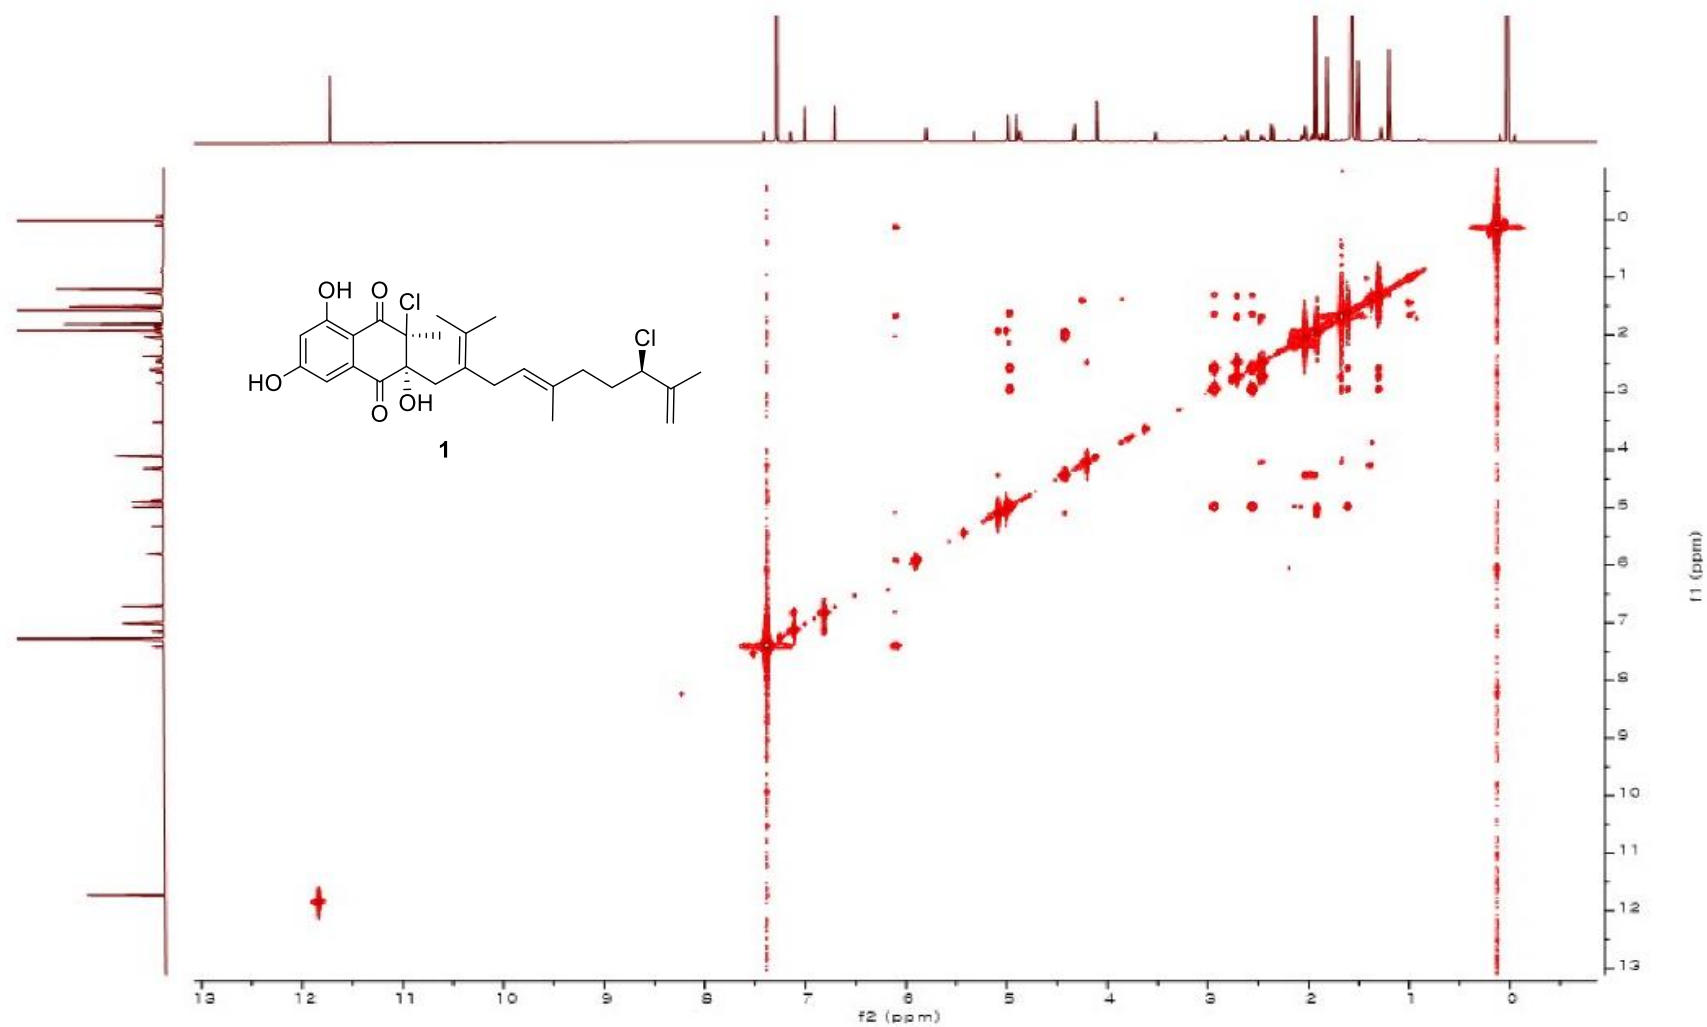

**Figure S4.** HSQC Spectrum of Merochlorin G (**1**) in CDCl<sub>3</sub>

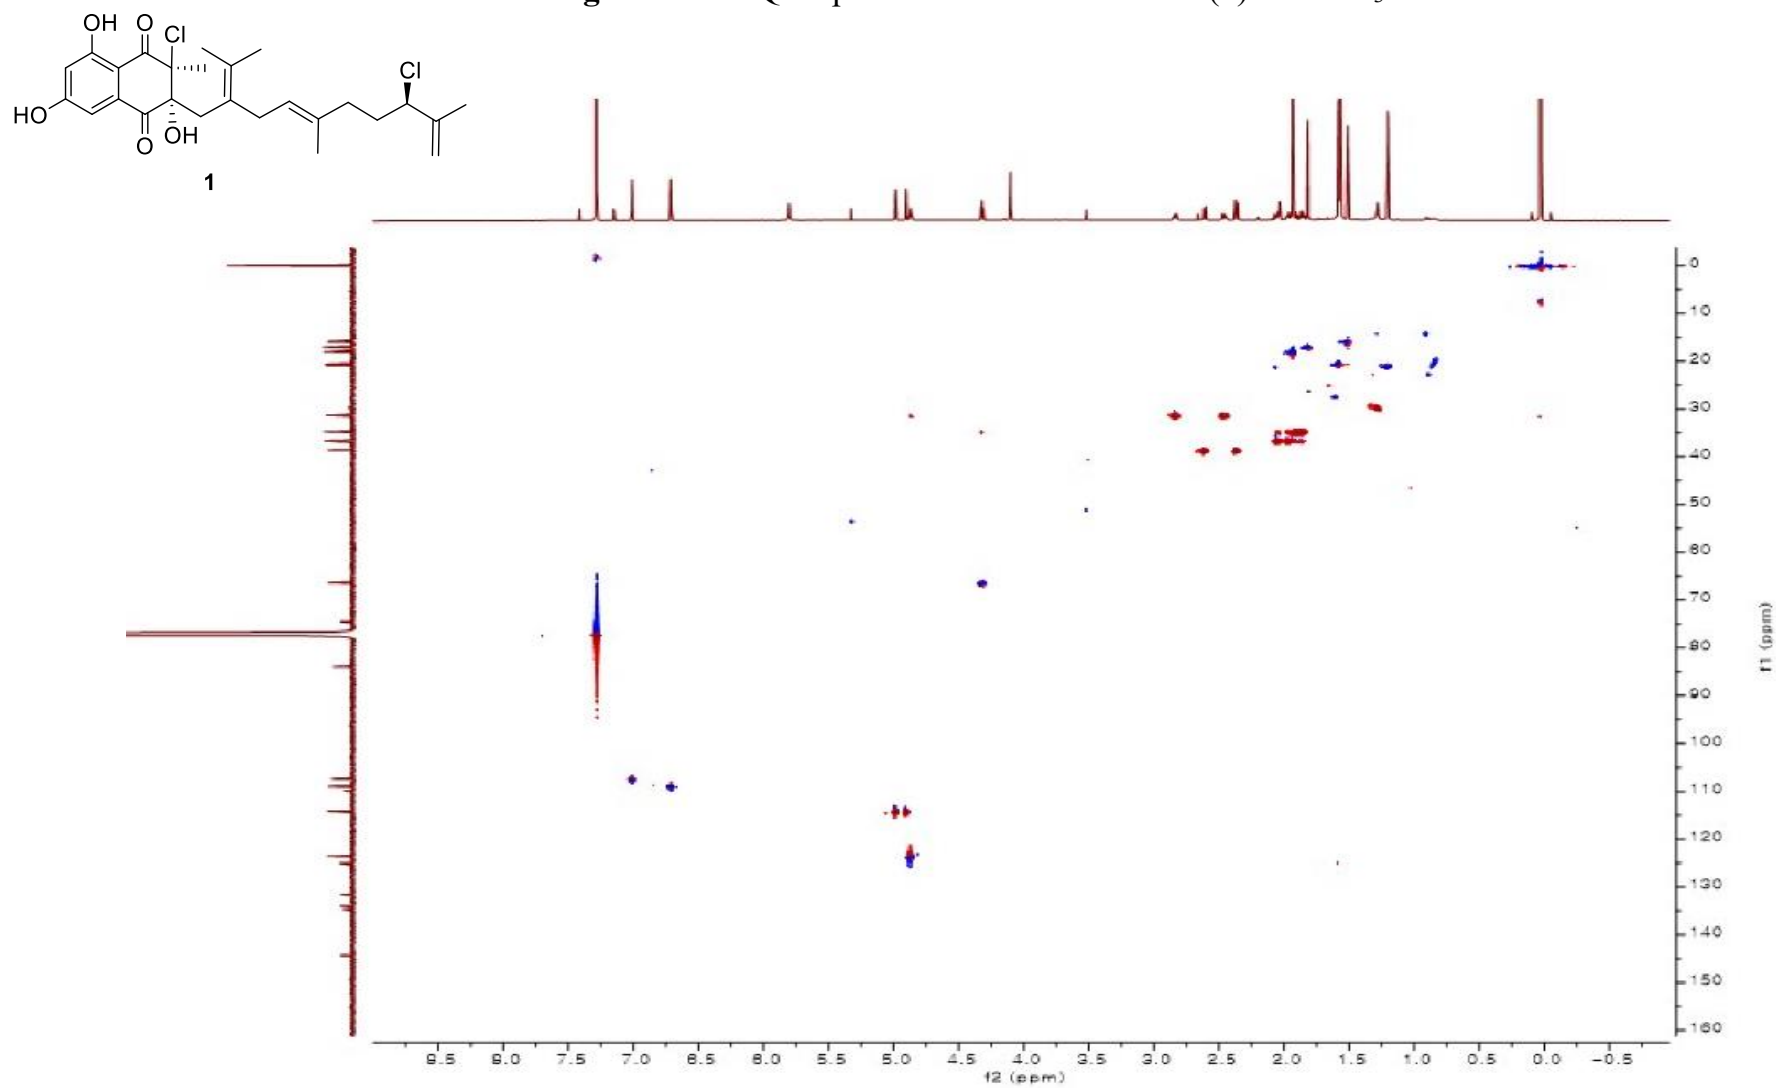



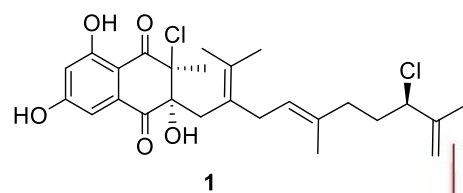

**Figure S5.** HMBC Spectrum of Merochlorin G (**1**) in CDCl<sub>3</sub>

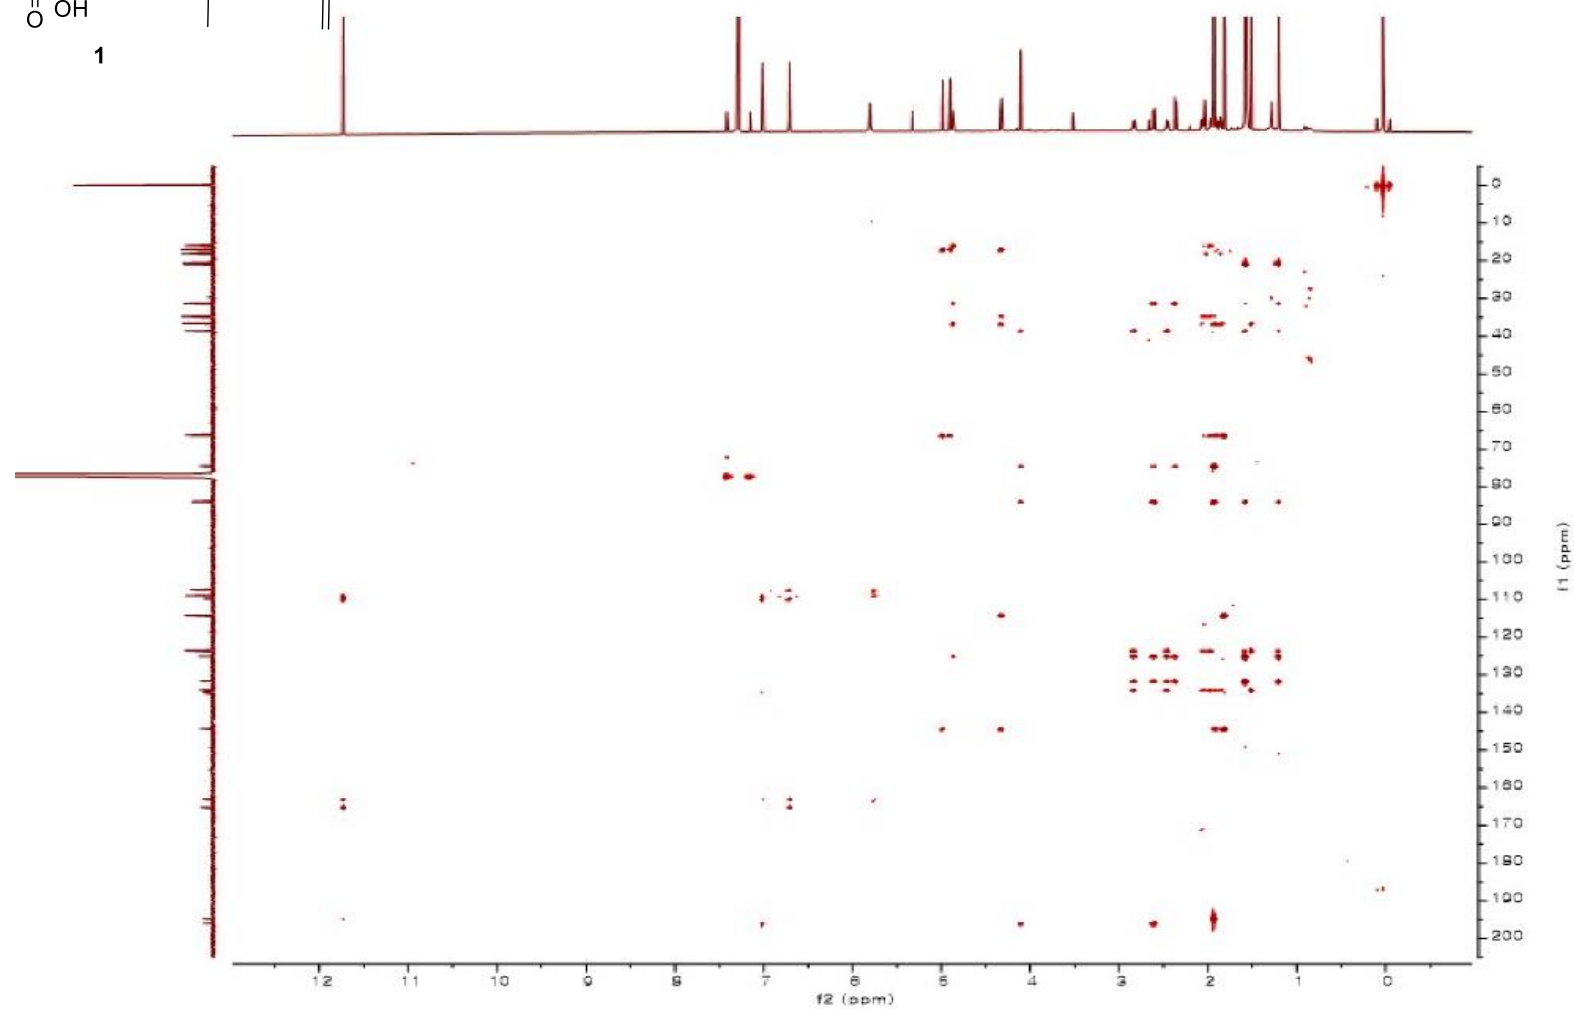

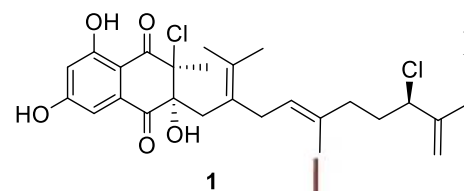

**Figure S6.** NOESY Spectrum of Merochlorin G (**1**) in CDCl<sub>3</sub>

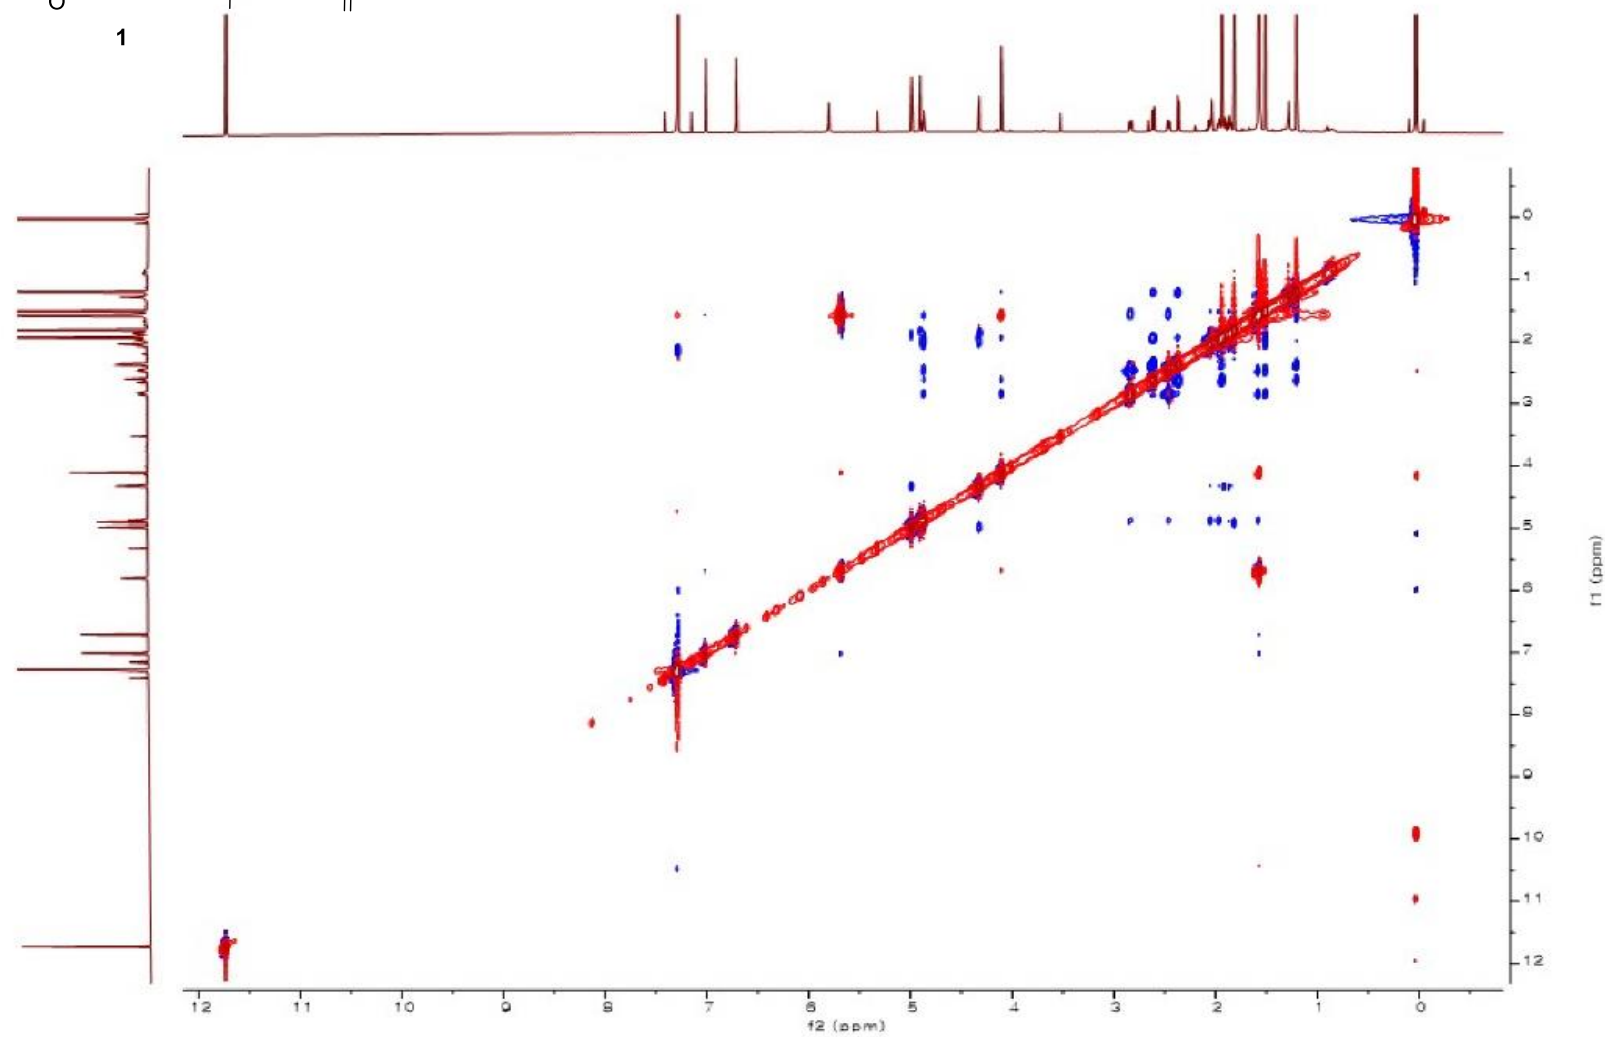

**Figure S7.**  $^1\text{H}$  NMR Spectrum of Merochlorin H (**2**) in  $\text{DMSO-}d_6$

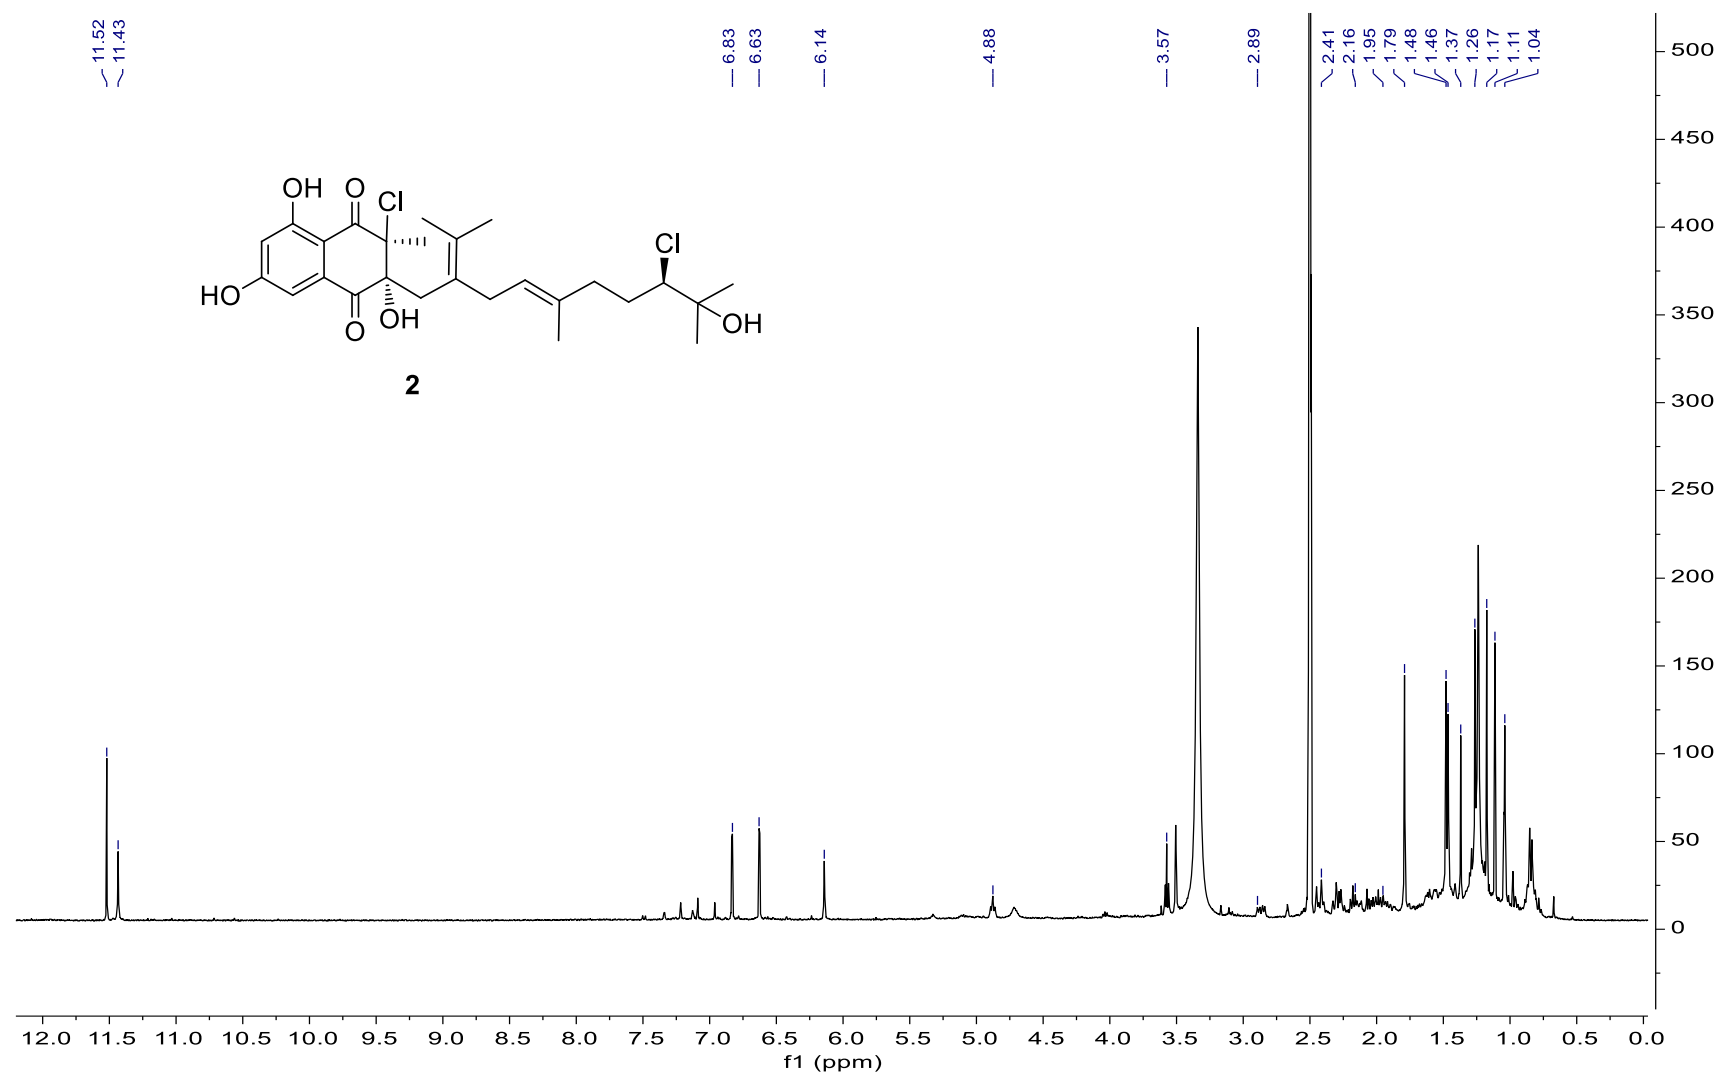

**Figure S8.**  $^{13}\text{C}$  NMR Spectrum of Merochlorin H (**2**) in  $\text{DMSO-}d_6$

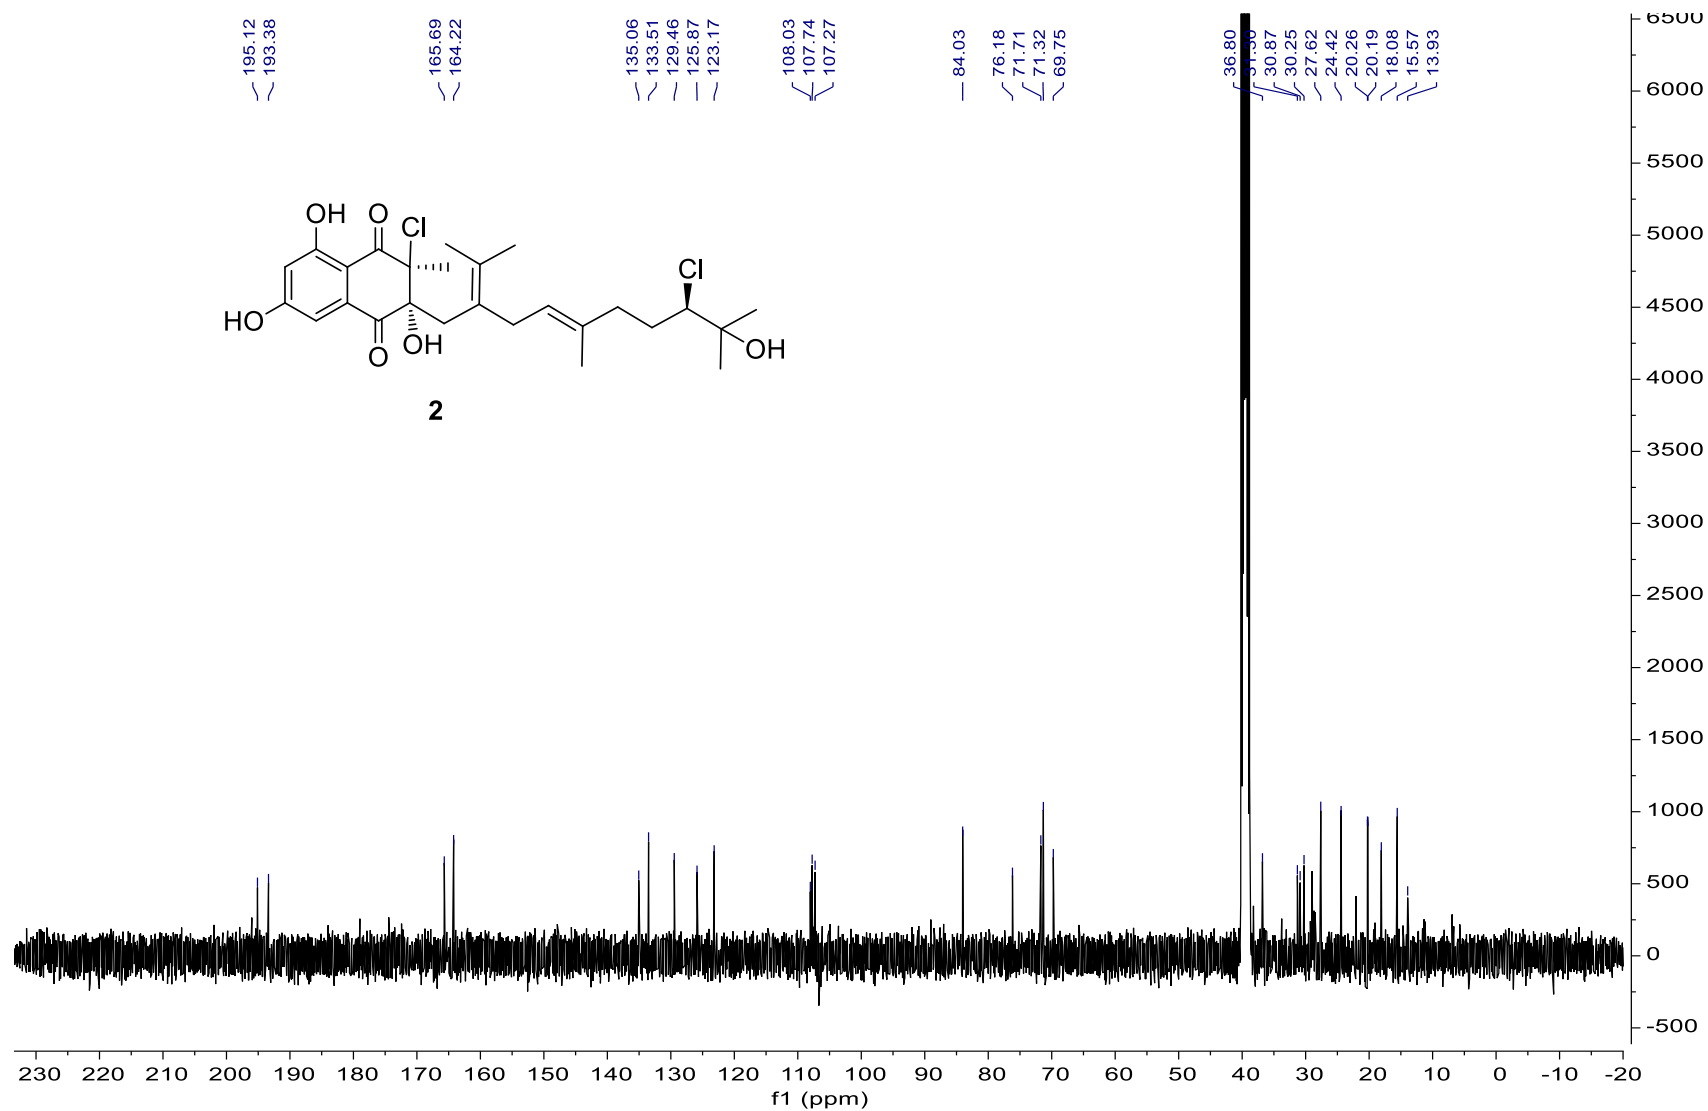

**Figure S9.**  $^1\text{H}$  NMR Spectrum of Merochlorin I (**3**) in  $\text{DMSO-}d_6$

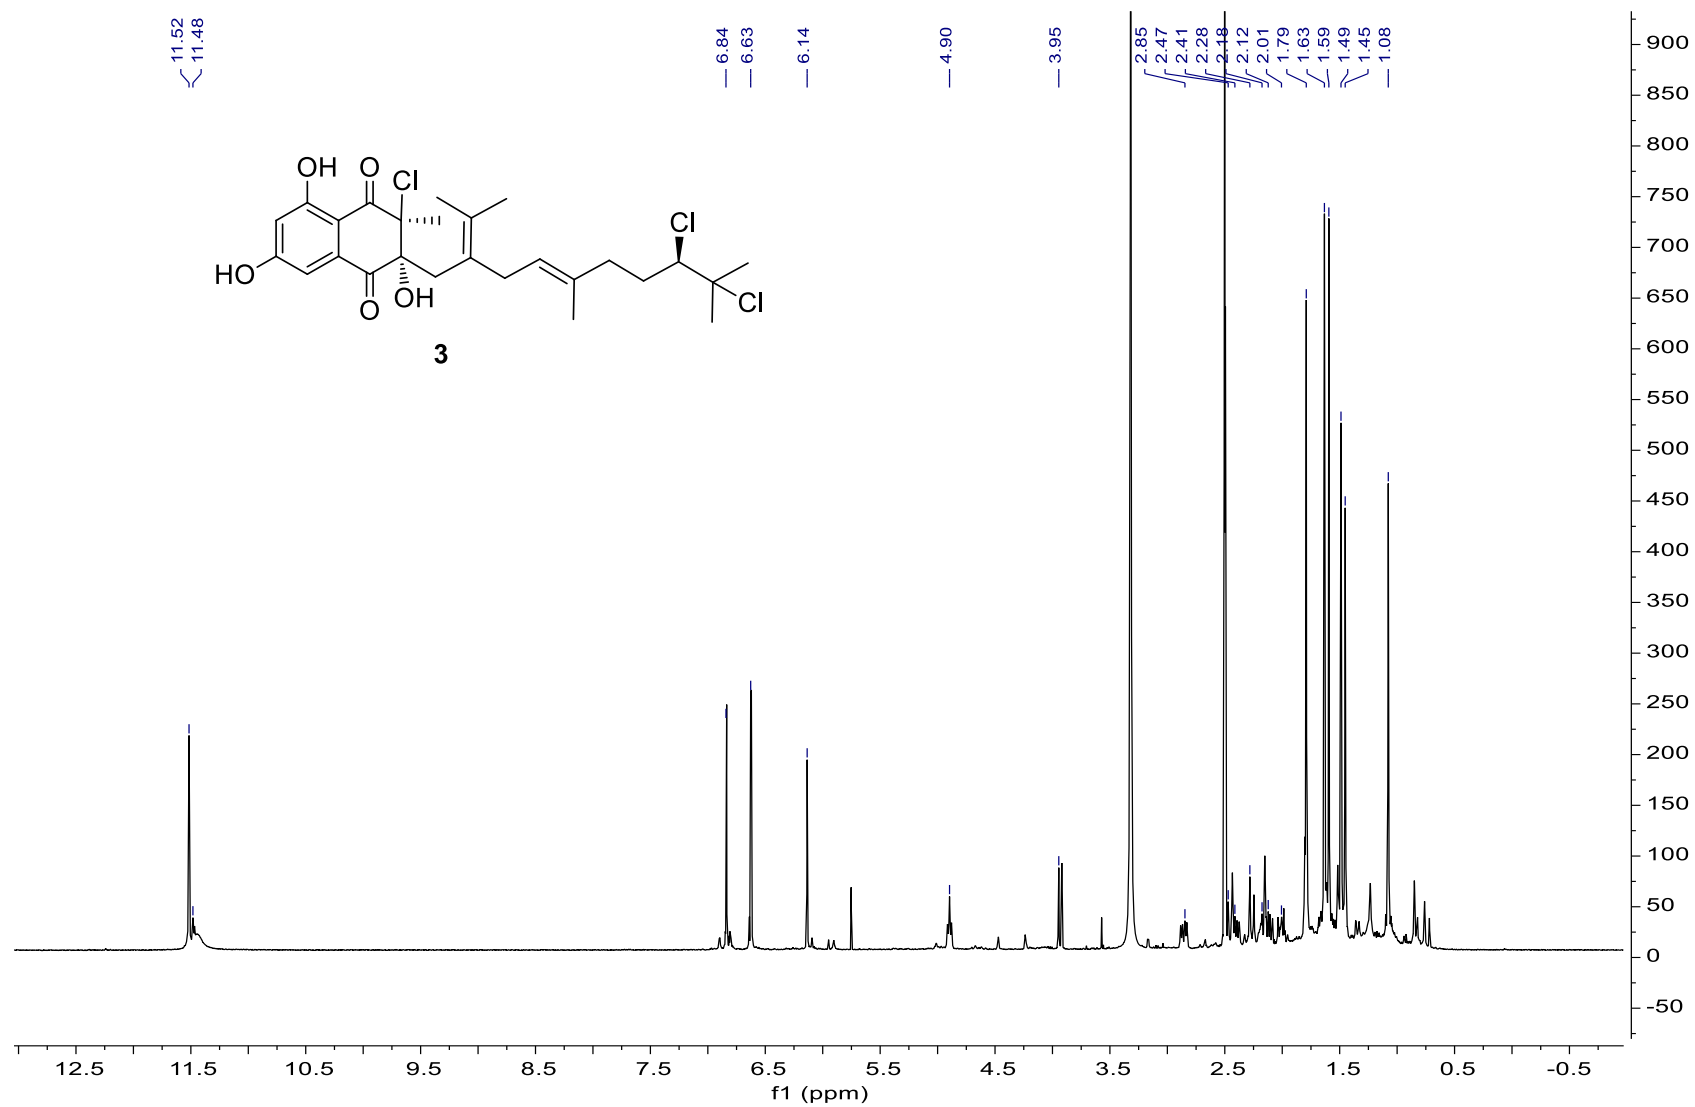

**Figure S10.**  $^{13}\text{C}$  NMR Spectrum of Merochlorin I (**3**) in  $\text{DMSO-}d_6$

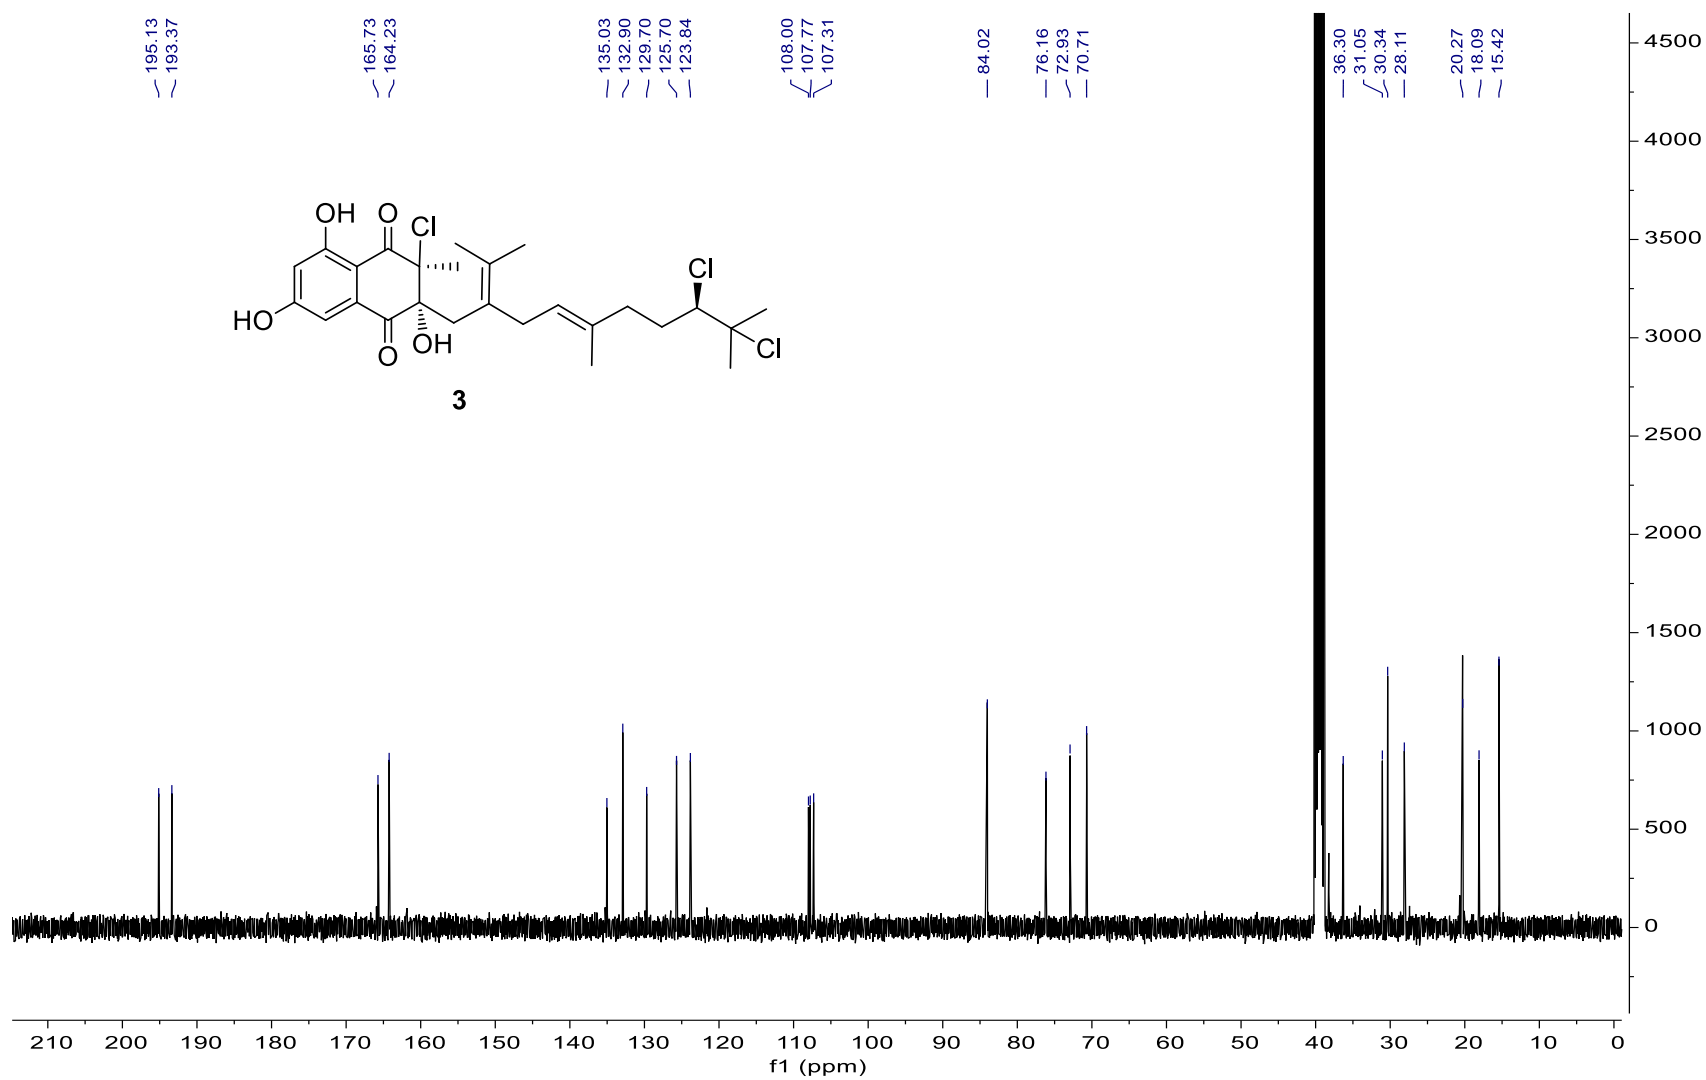

**Figure S11.**  $^1\text{H}$  NMR Spectrum of Merochlorin J (**4**) in  $\text{DMSO}-d_6$

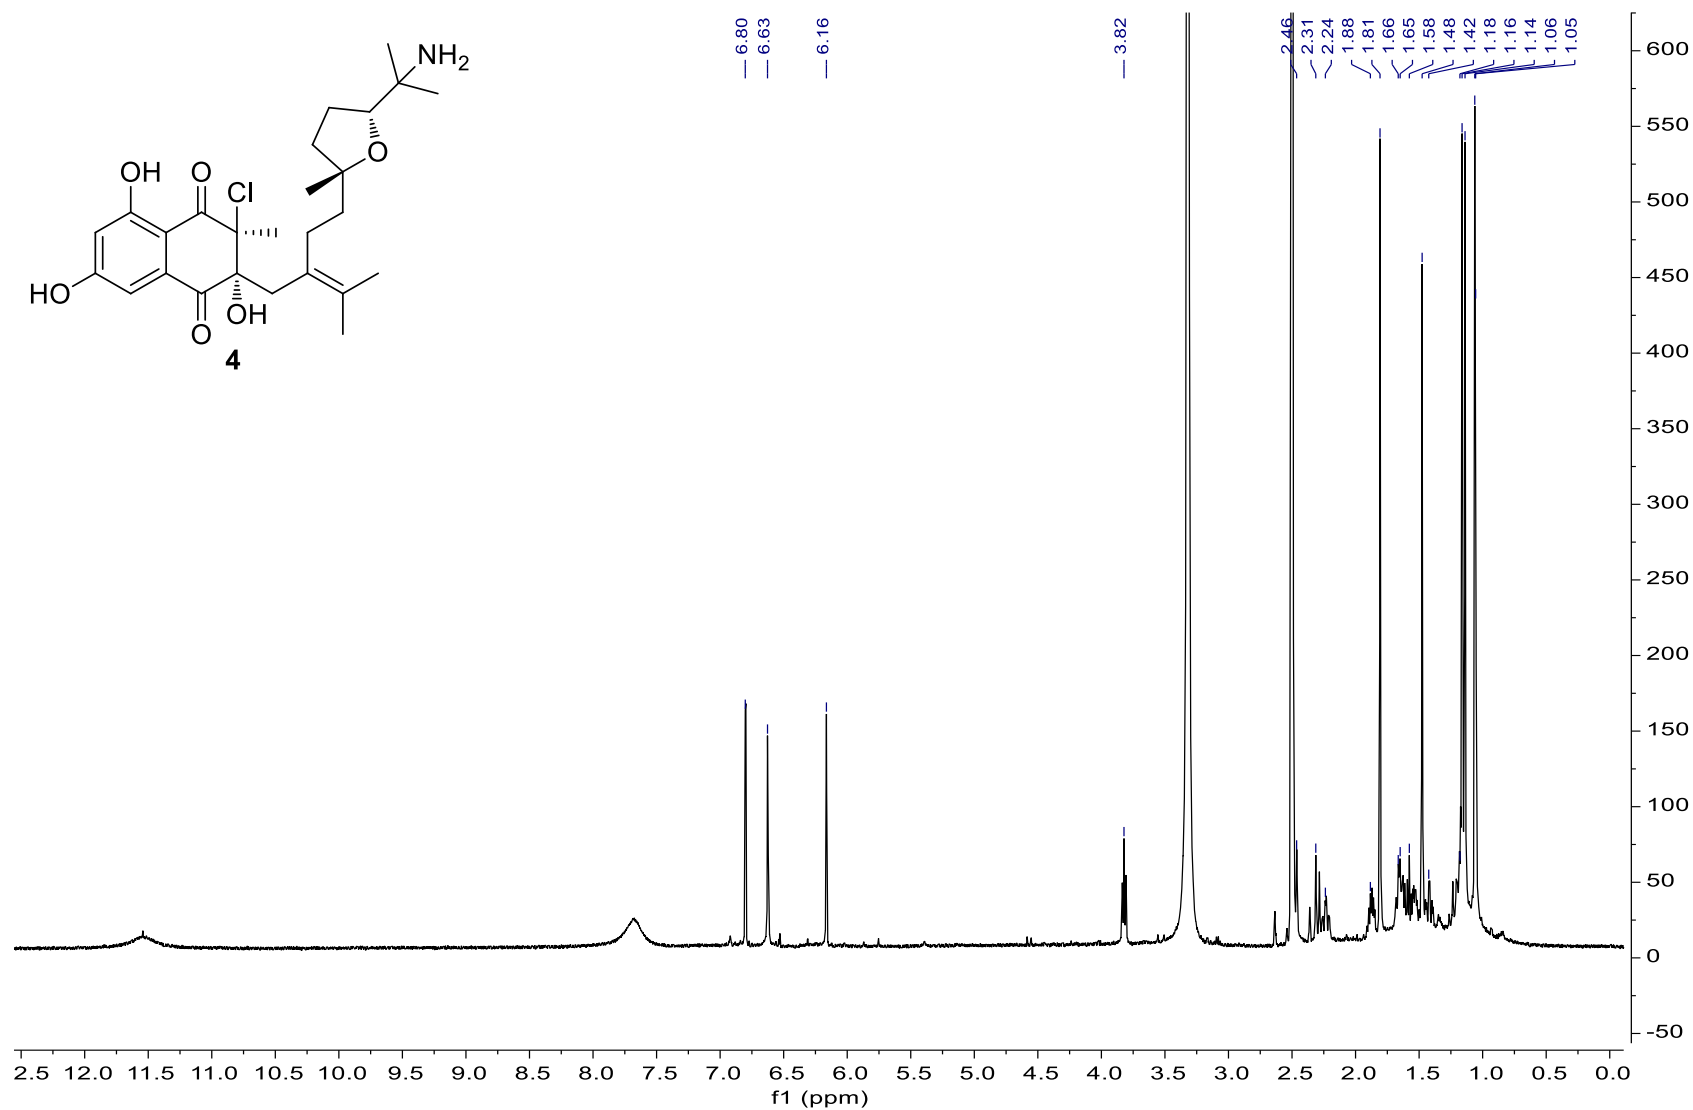

**Figure S12.**  $^{13}\text{C}$  NMR Spectrum of Merochlorin J (**4**) in  $\text{DMSO}-d_6$

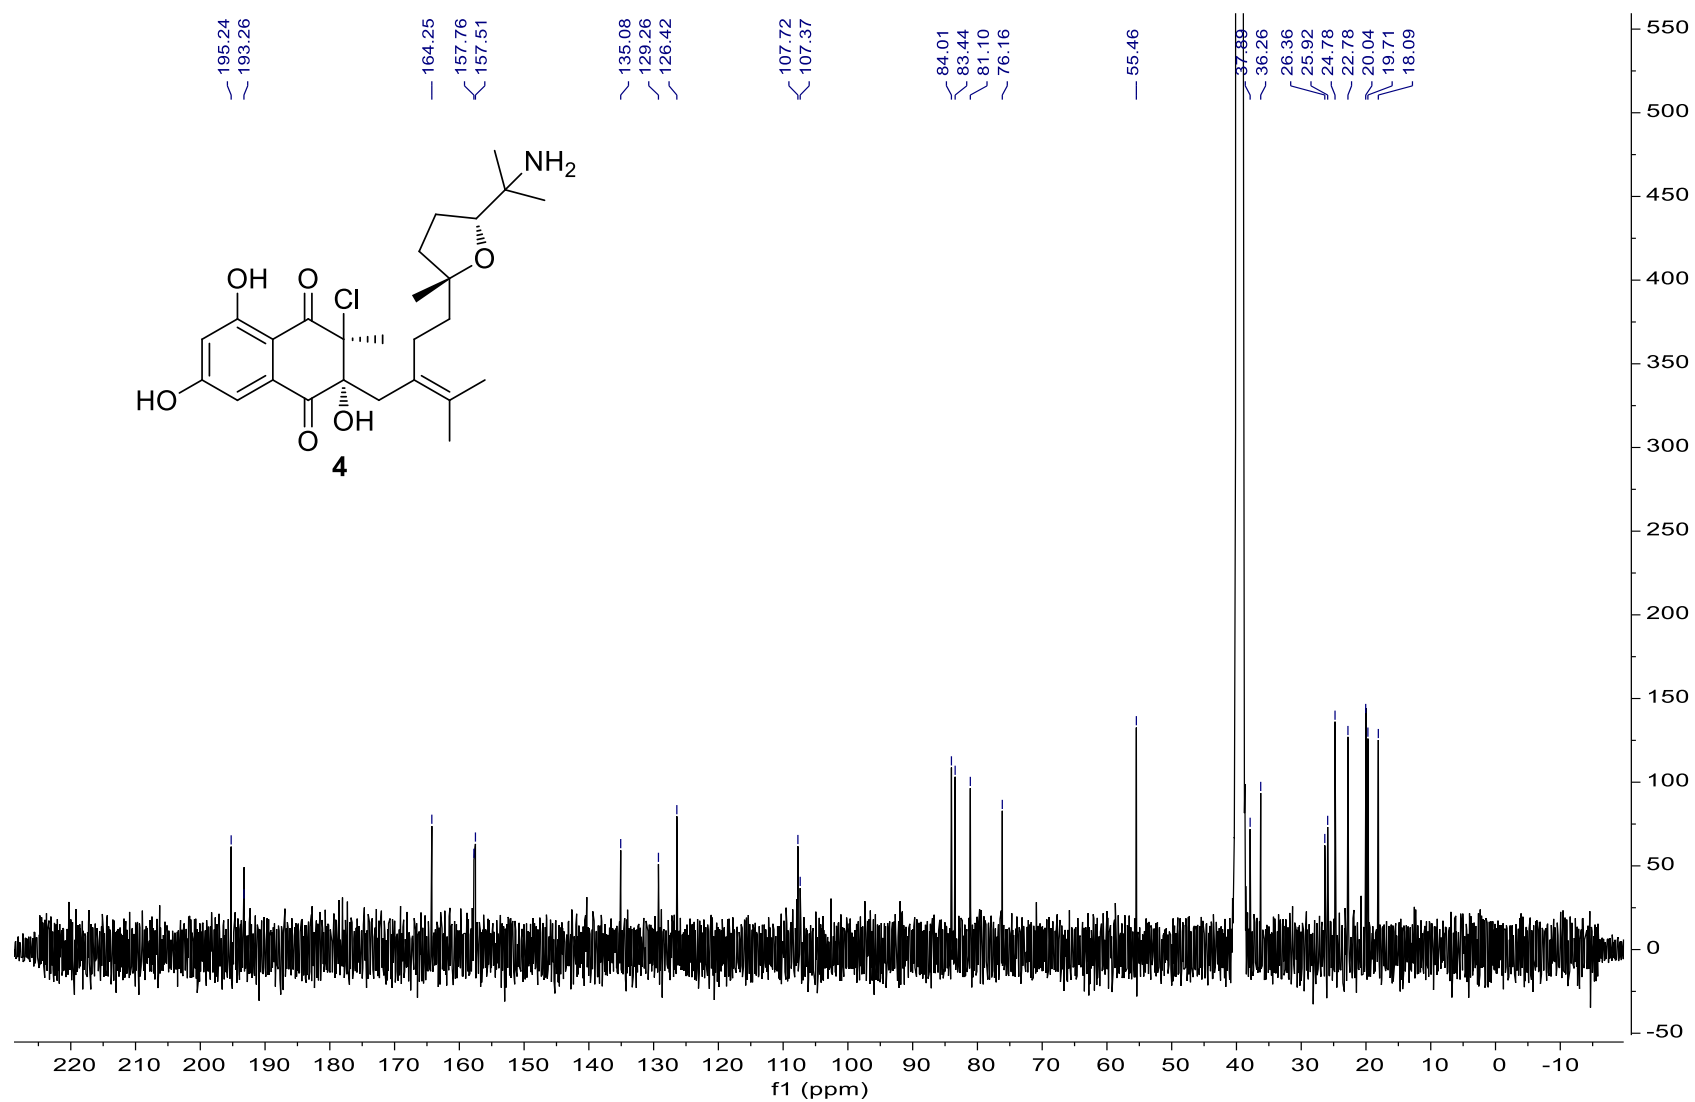



**Figure S13.** COSY Spectrum of Merochlorin J (**4**) in DMSO-*d*<sub>6</sub>

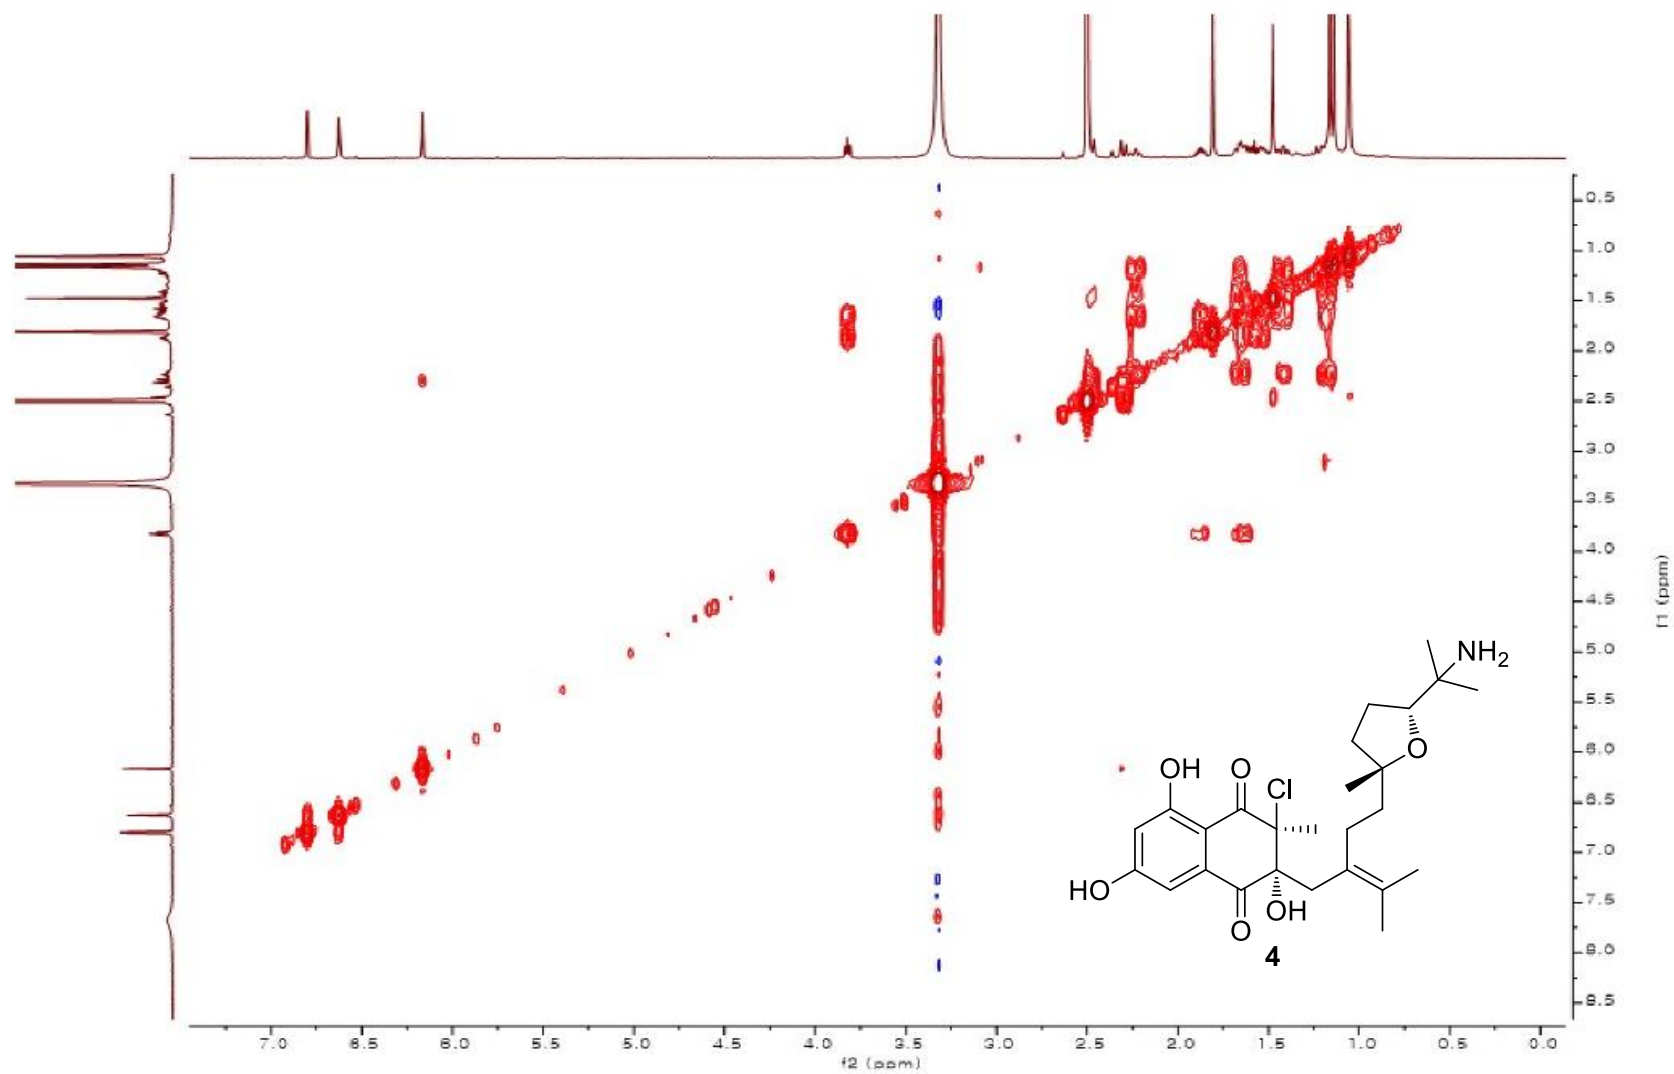

**Figure S14.** HSQC Spectrum of Merochlorin J (**4**) in DMSO-*d*<sub>6</sub>

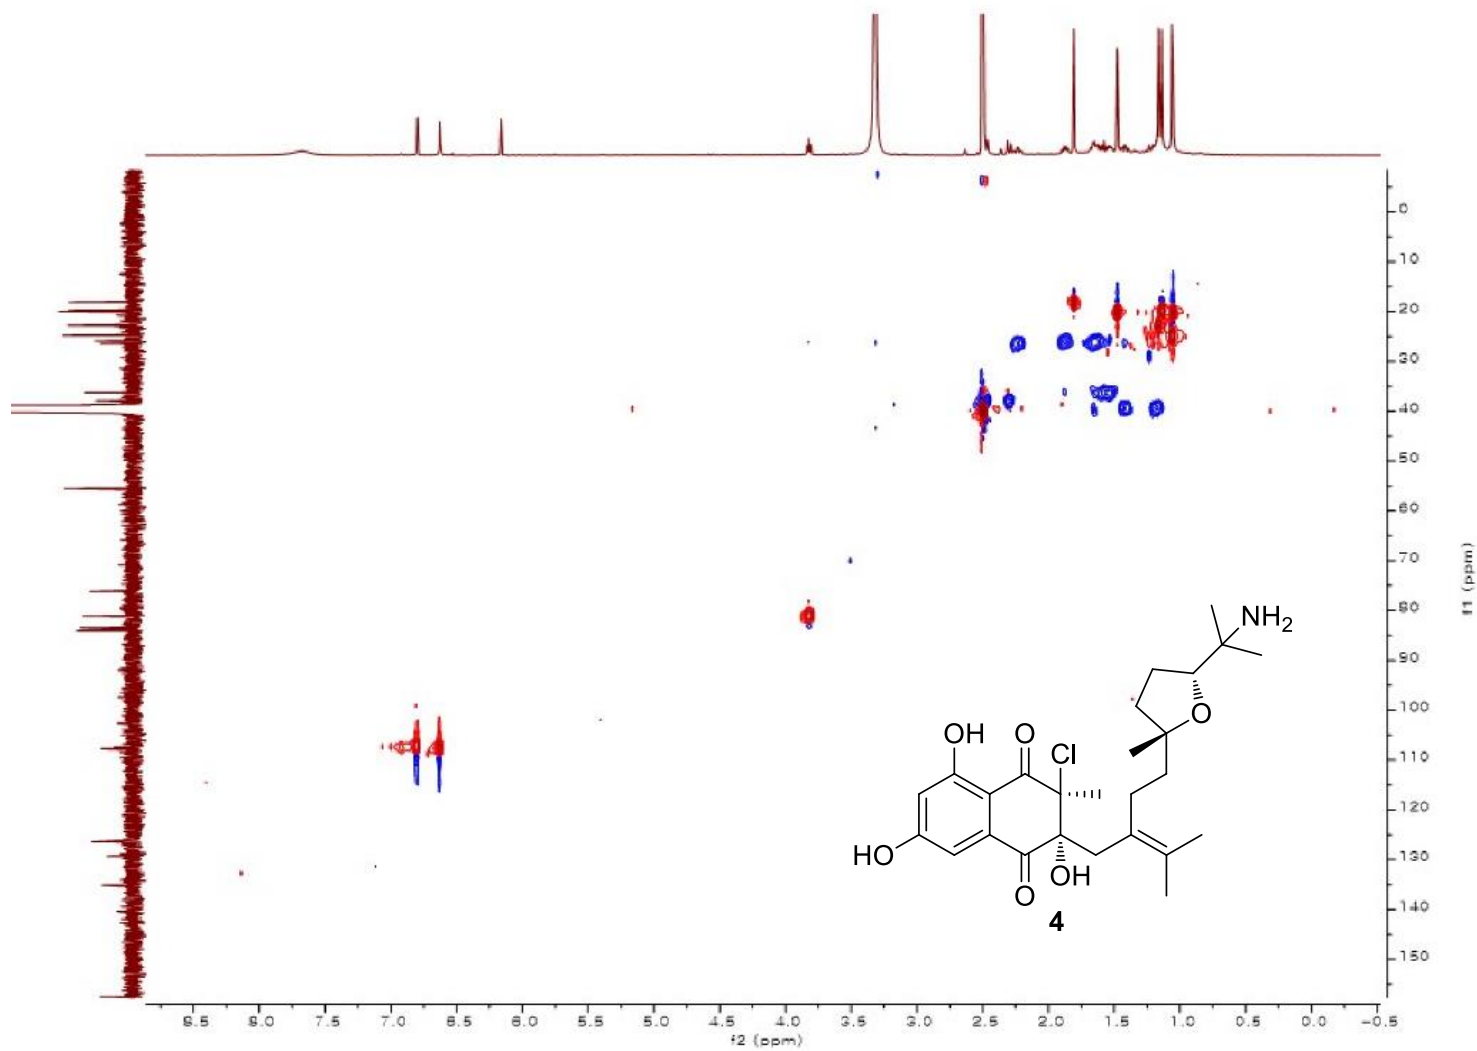

**Figure S15.** HMBC Spectrum of Merochlorin J (**4**) in DMSO-*d*<sub>6</sub>

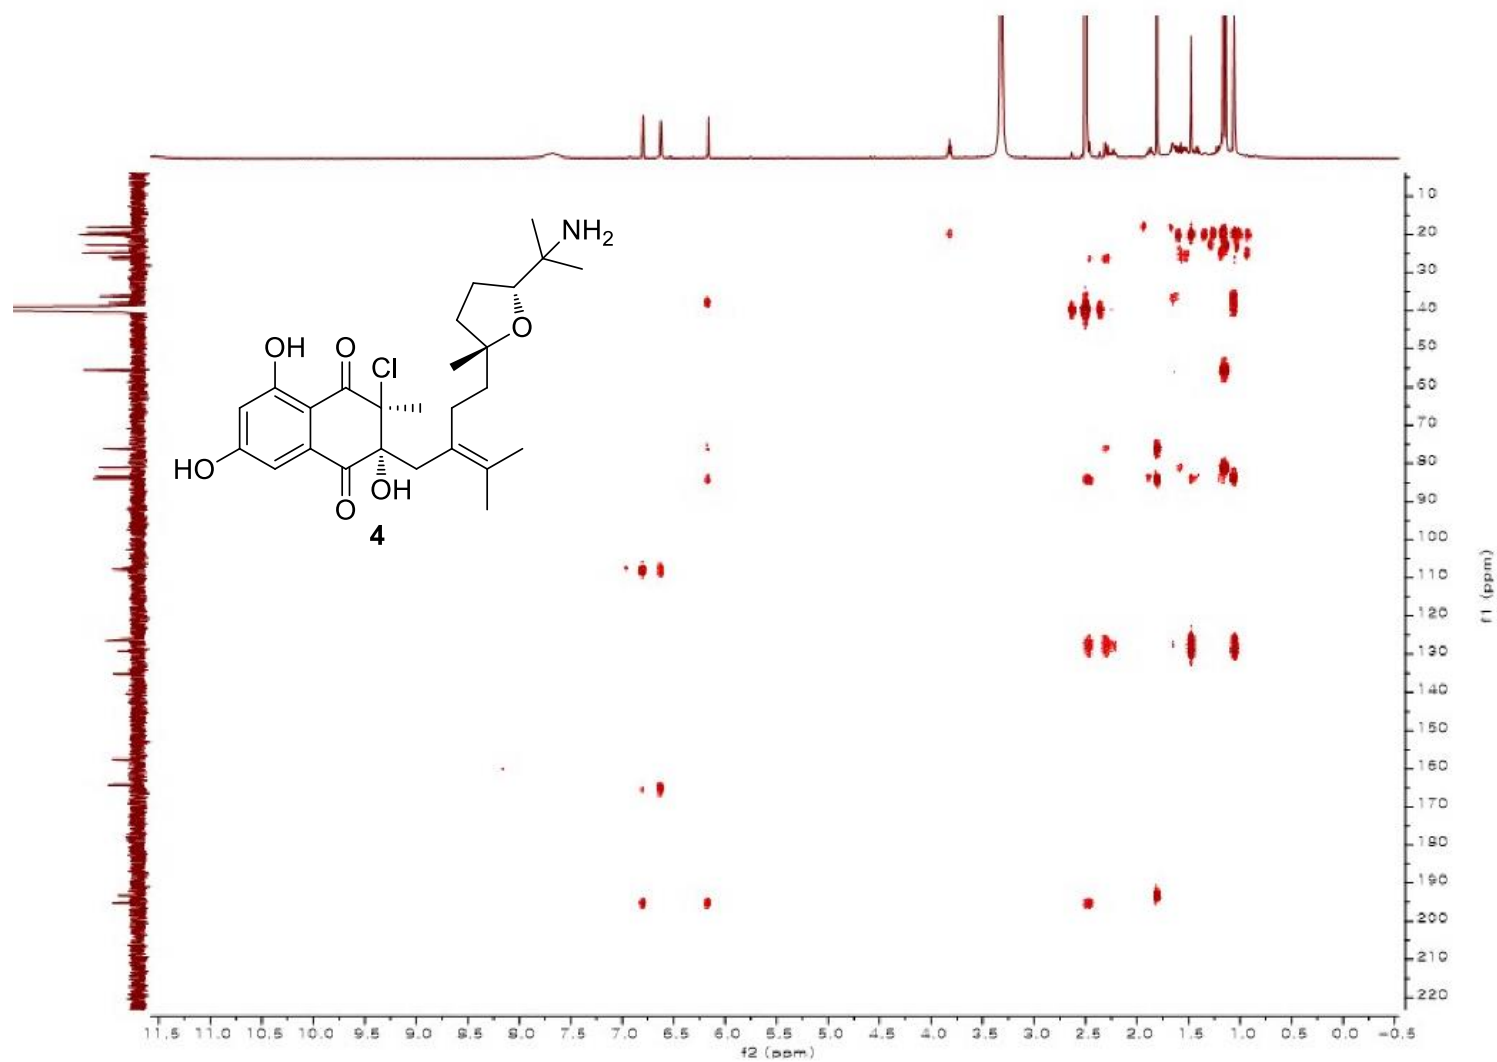

**Figure S16.** NOESY Spectrum of Merochlorin J (**4**) in DMSO-*d*<sub>6</sub>

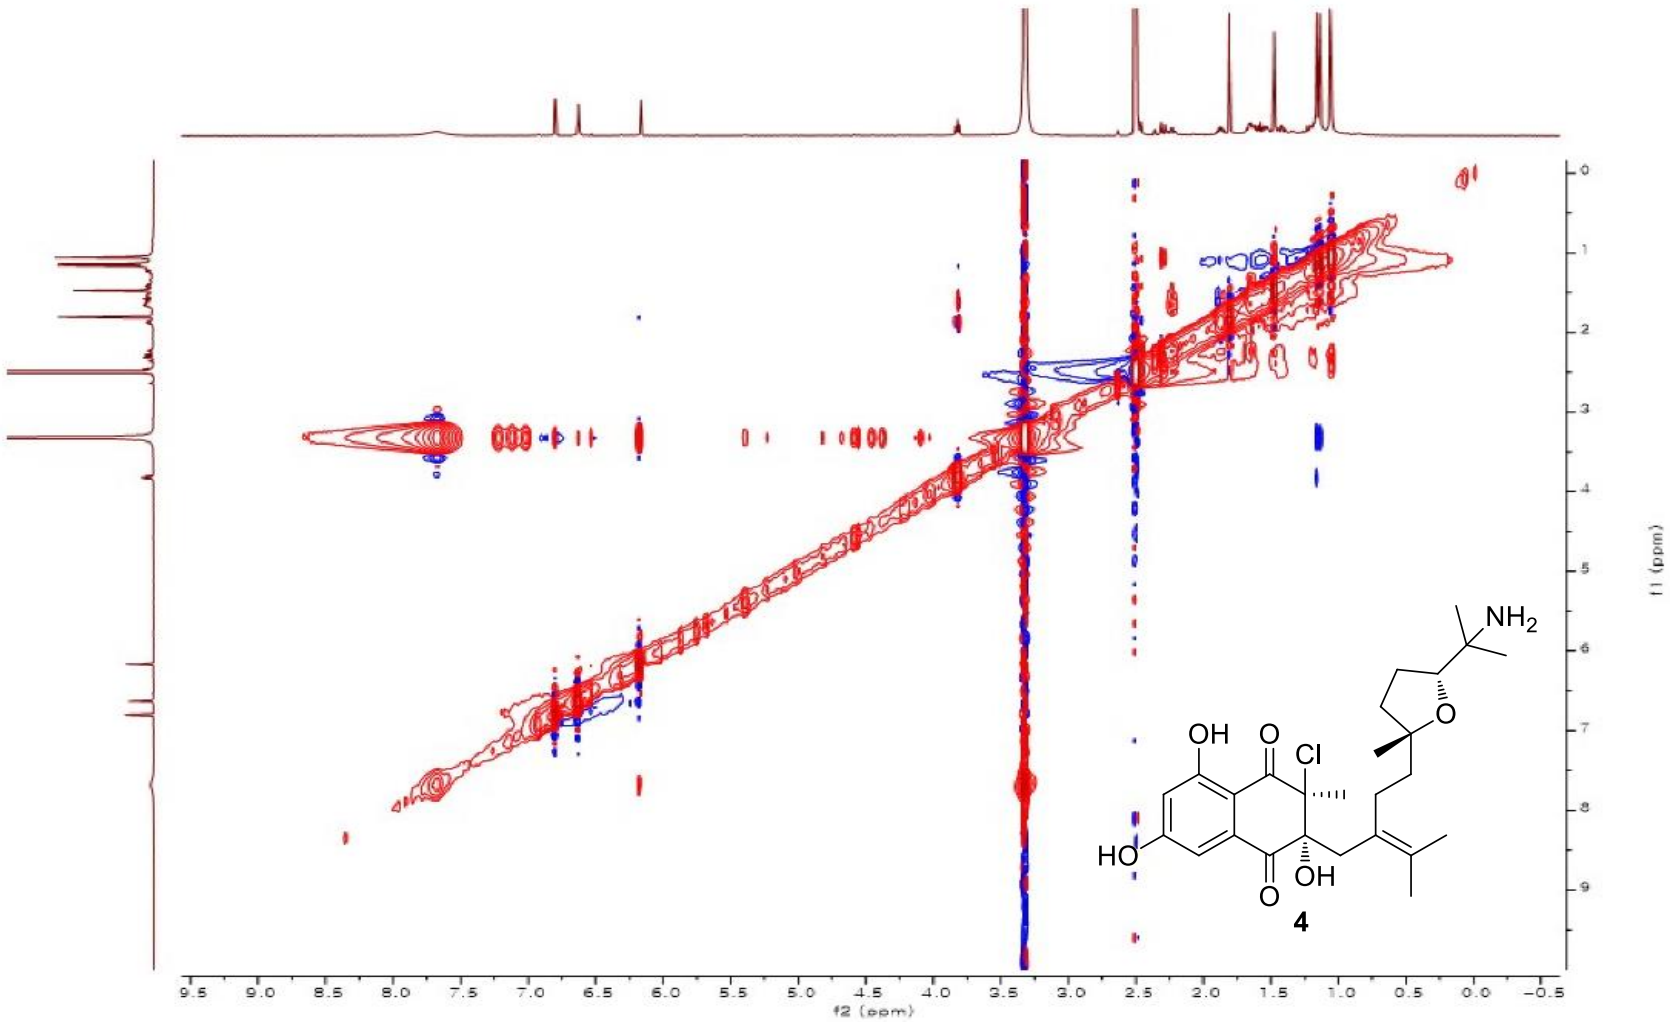

**Figure S17.**  $^1\text{H}$  NMR Spectrum of Compound **10** in  $\text{DMSO}-d_6$

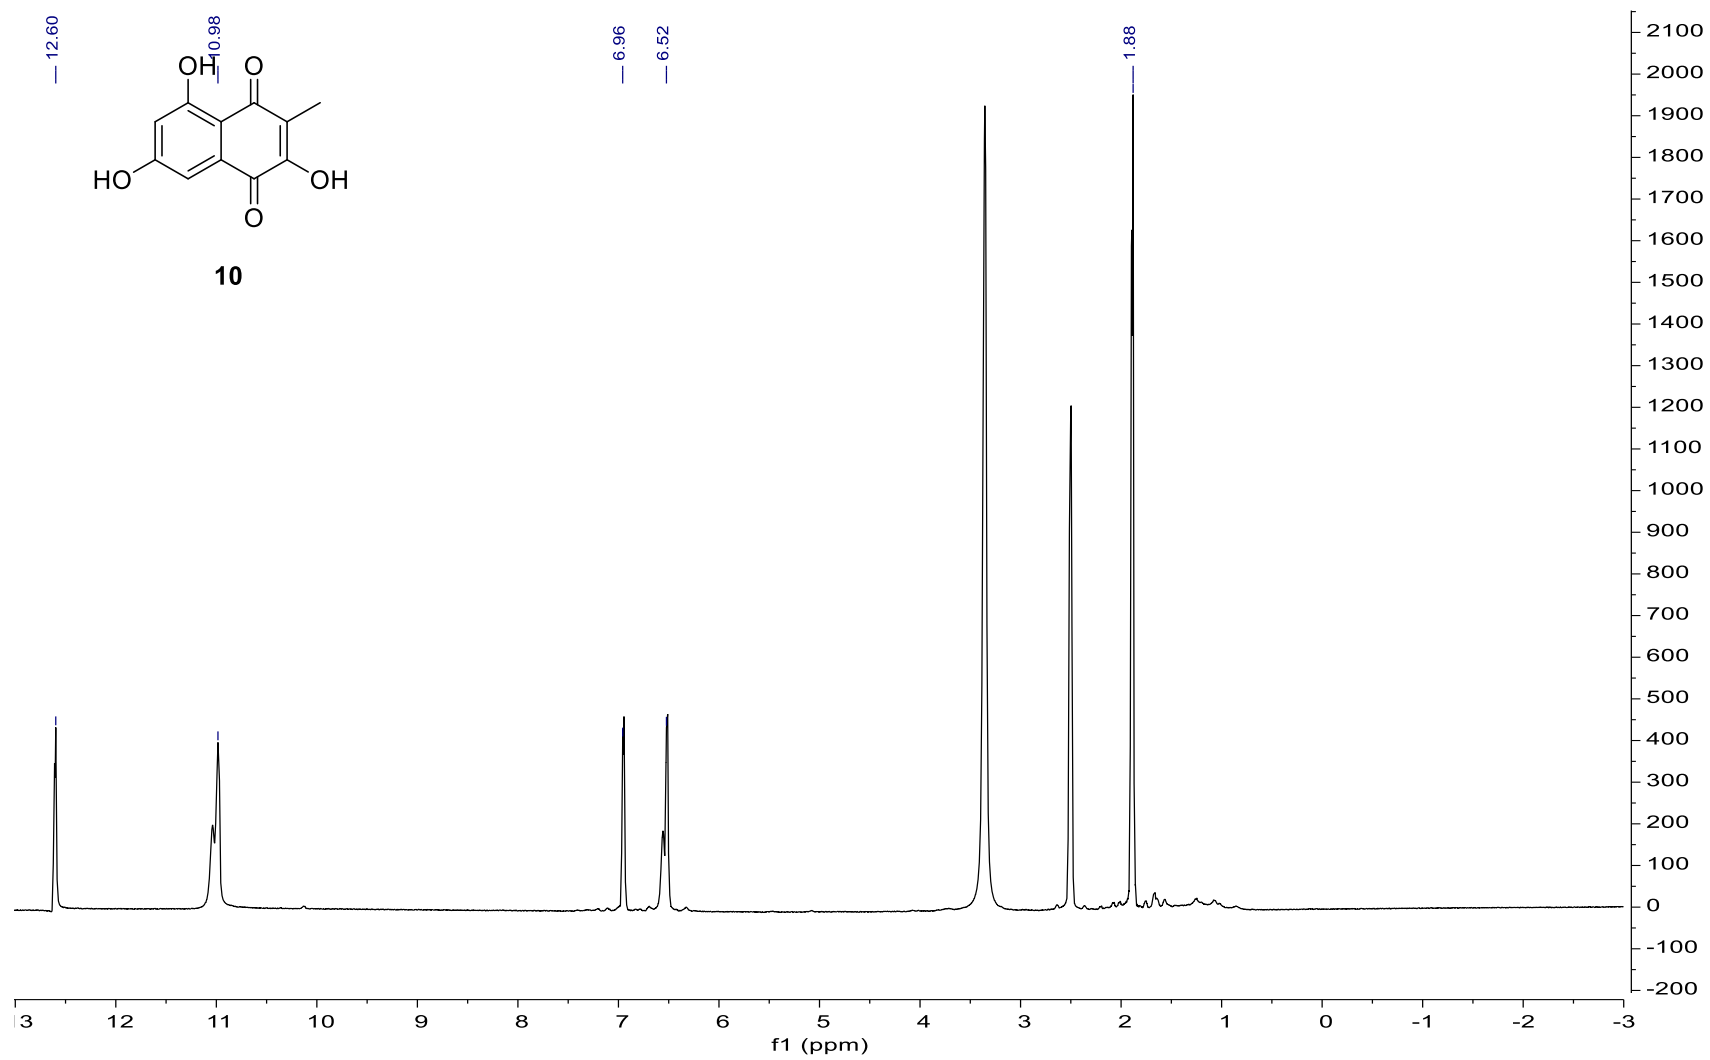

**Figure S18.**  $^{13}\text{C}$  NMR Spectrum of Compound **10** in  $\text{DMSO-}d_6$

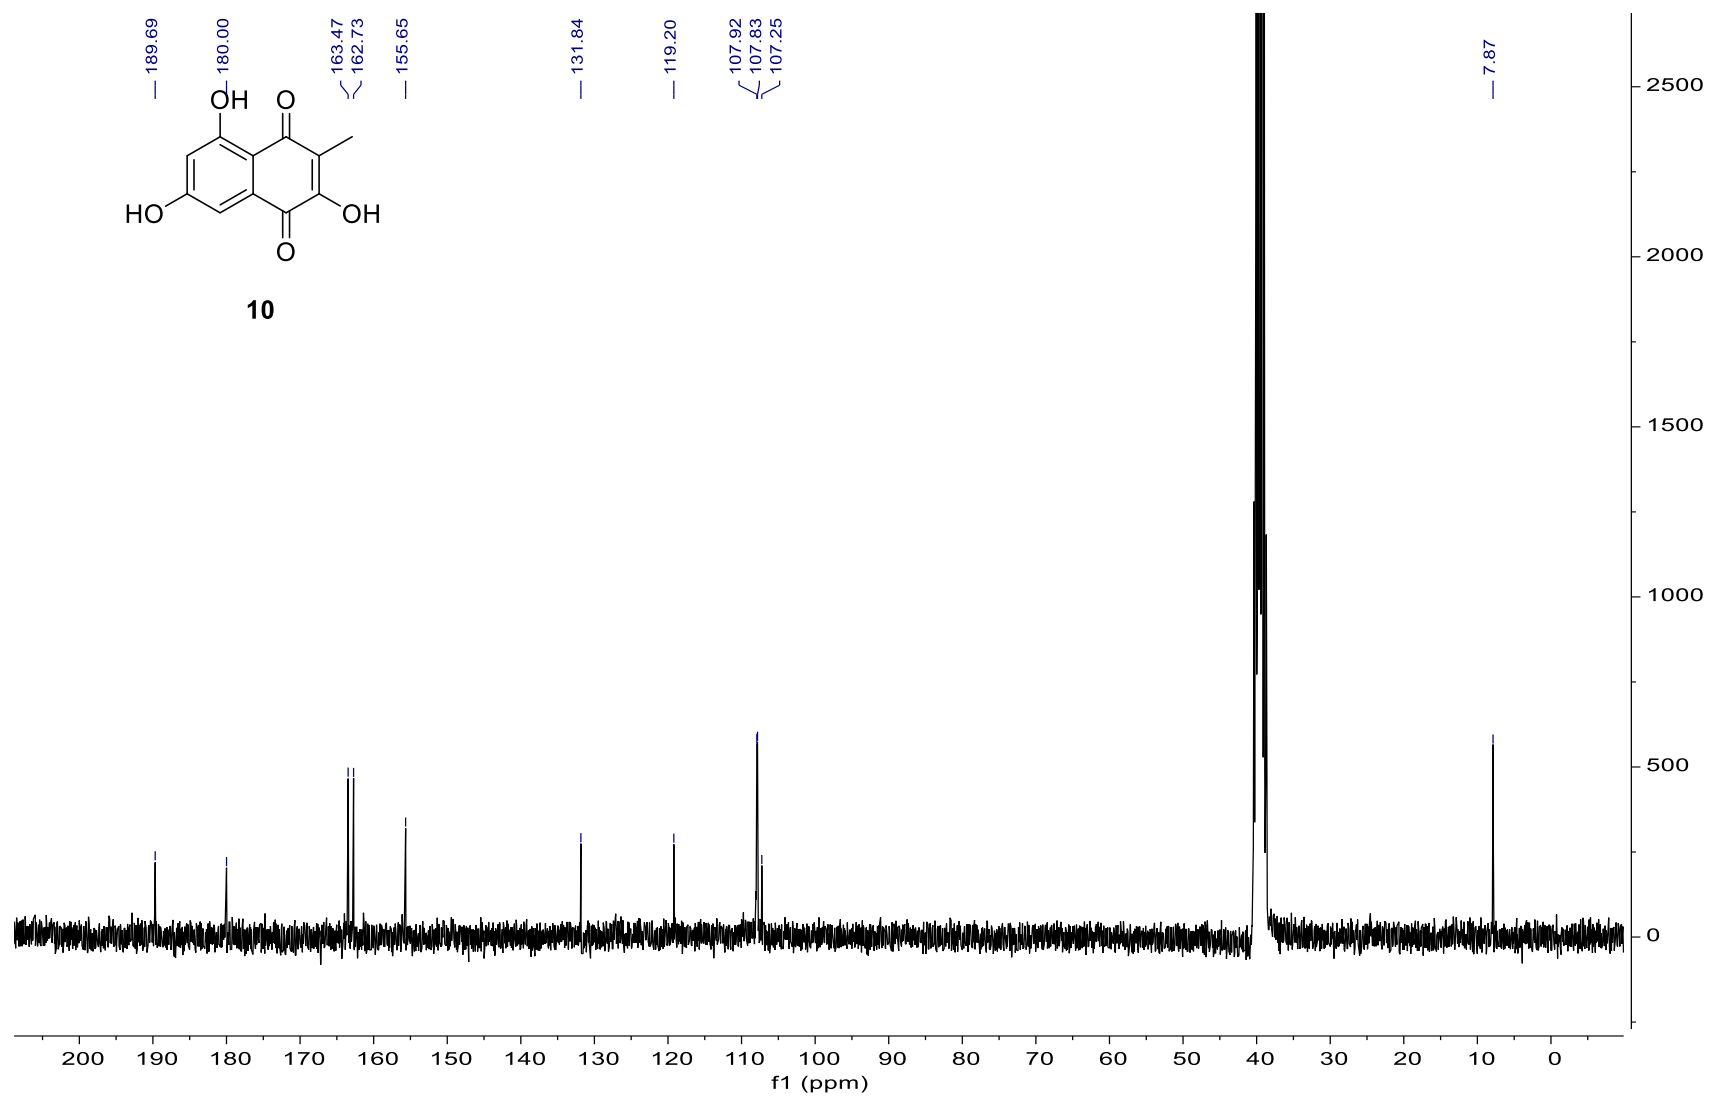

**Figure S19.** COSY Spectrum of Compound **10** in DMSO- $d_6$

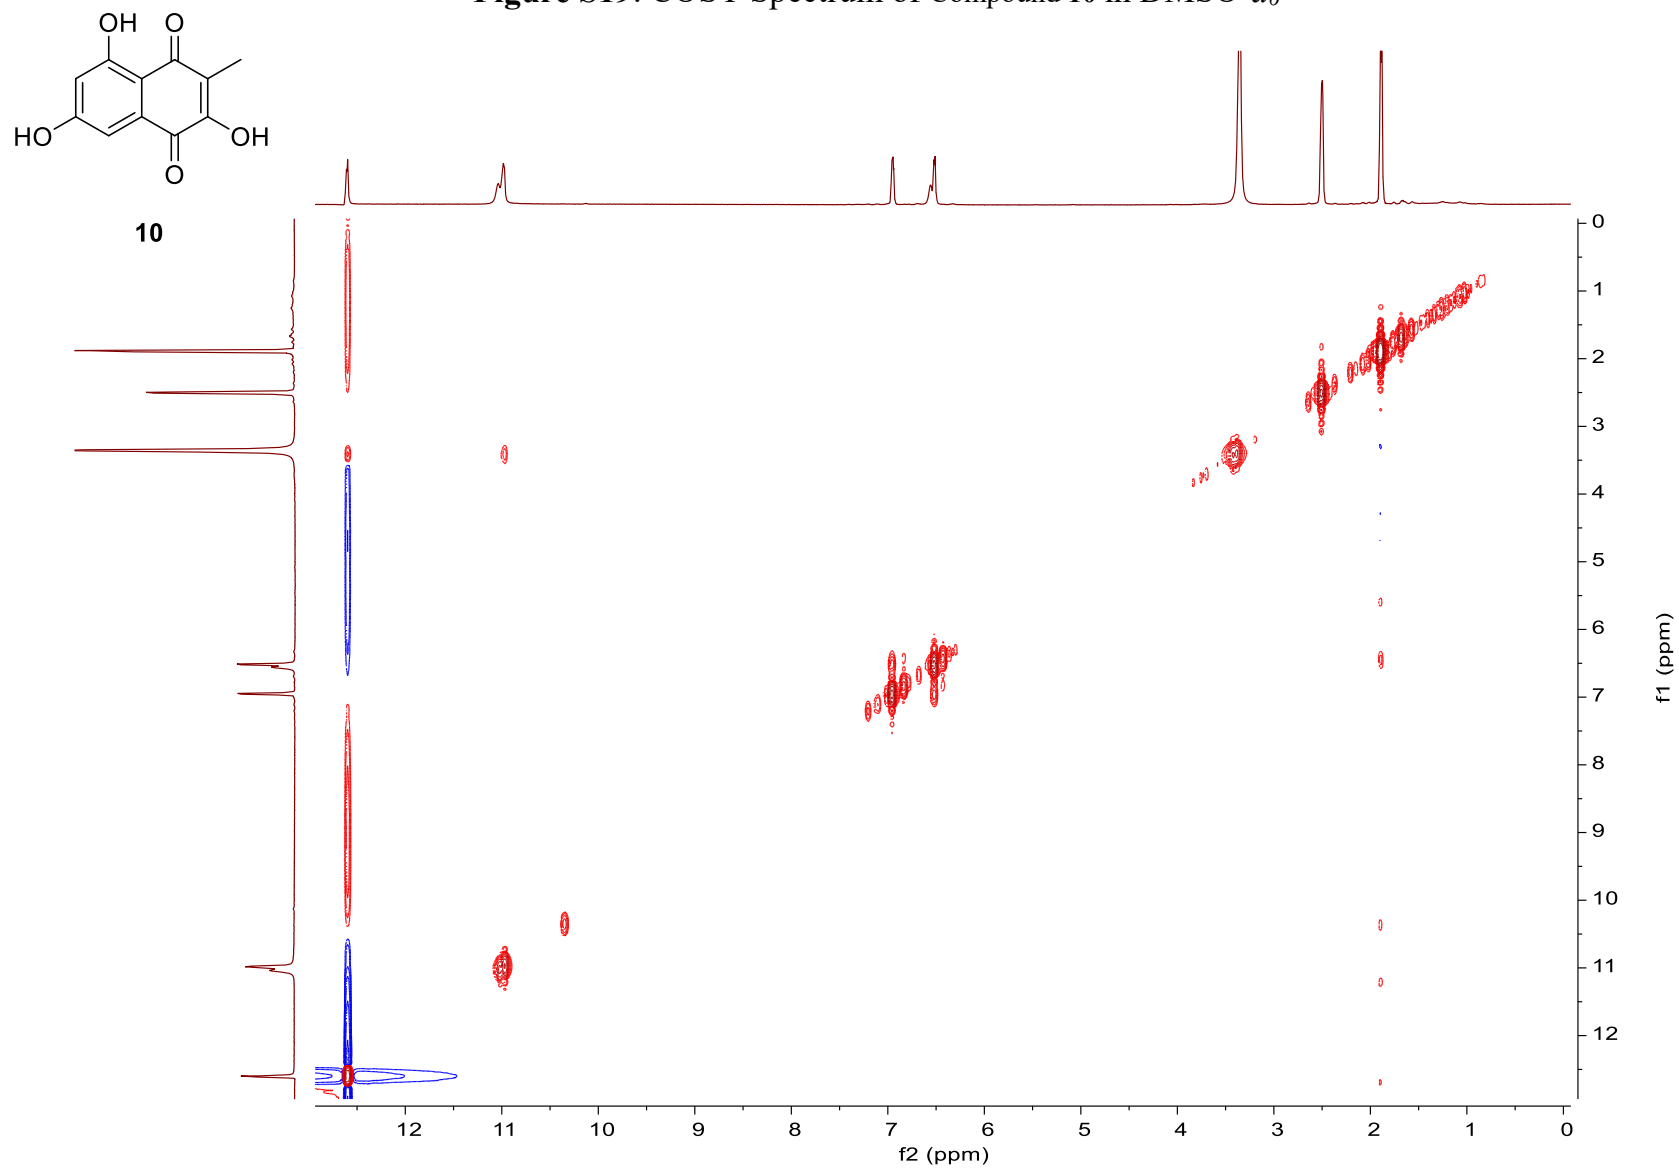

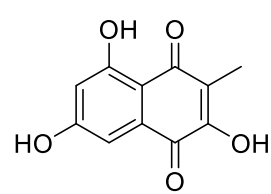

**10**

**Figure S20.** HSQC Spectrum of Compound **10** in DMSO- $d_6$

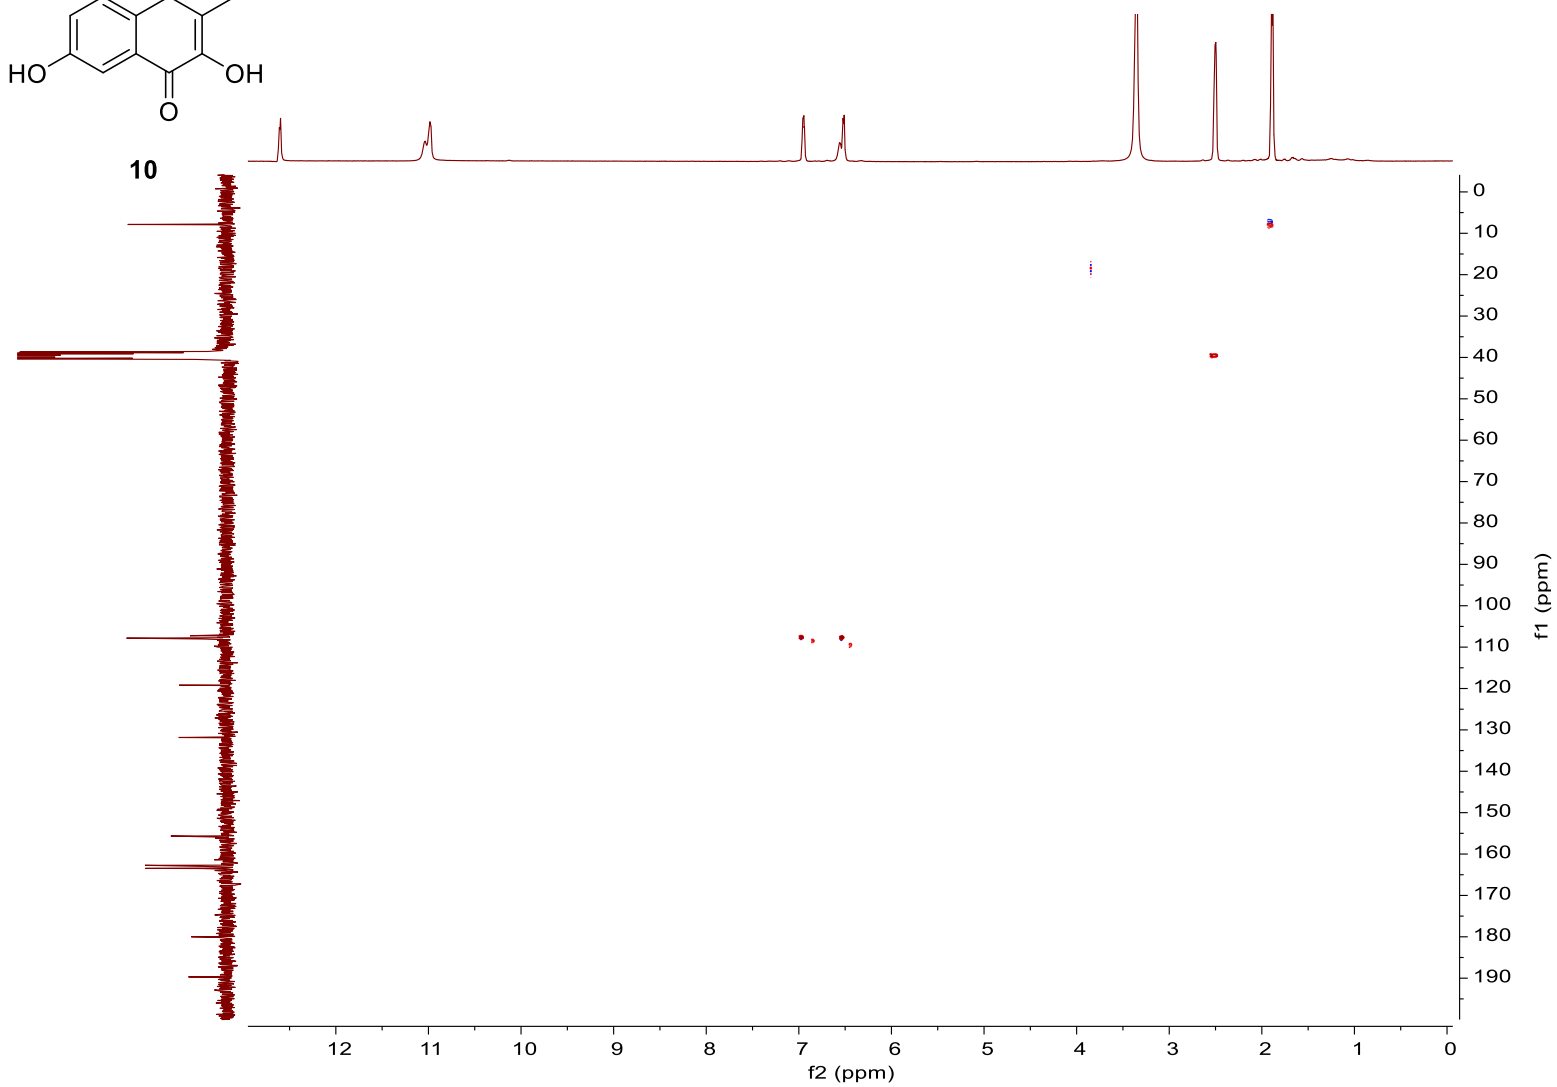



**Figure S21.** HMBC Spectrum of Compound **10** in DMSO- $d_6$

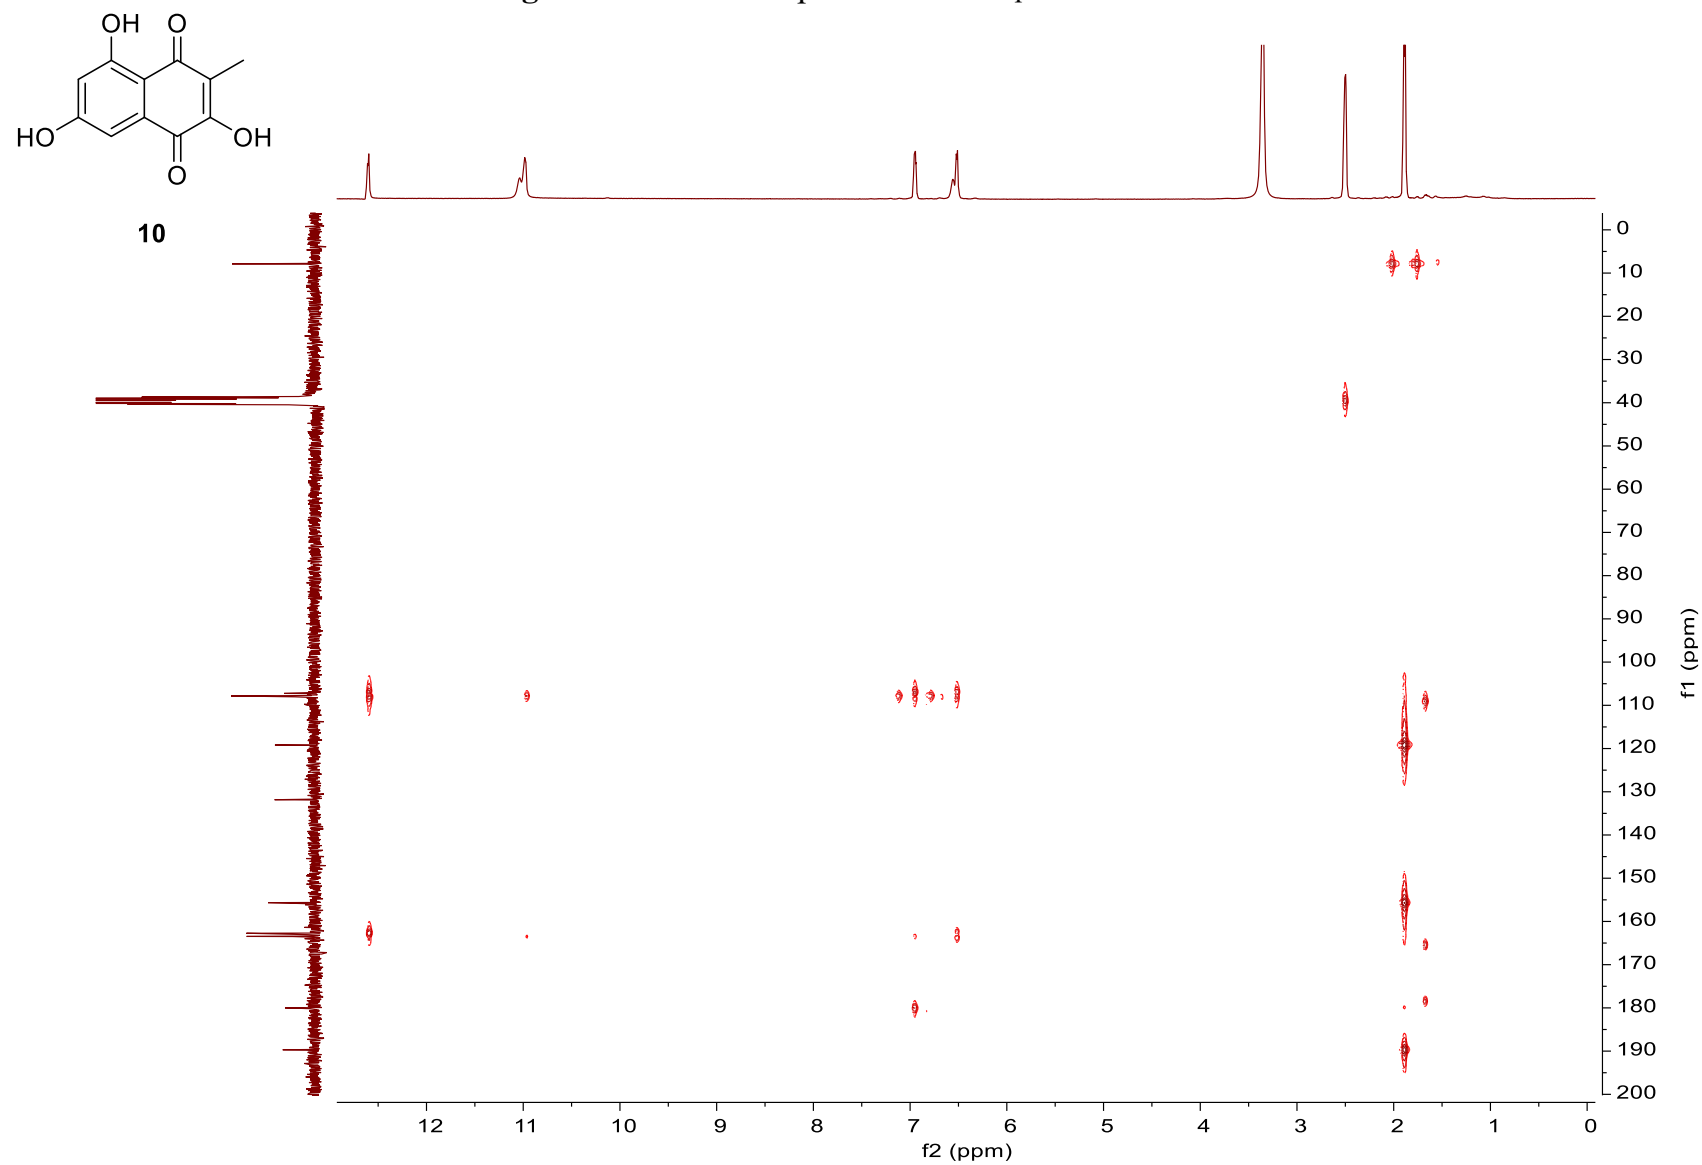

**Figure S22.** DP4 analysis of NMR calculation of Merochlorin G (1)

the goodman group  
university of cambridge

[about us](#)  
[contact us](#)  
[interesting stuff](#)  
[people](#)  
[photos](#)  
[research](#)  
[tools](#)  
[publications](#)  
[Chemical Informatics Letters](#)  
  
[DP4 NMR](#)  
[assignment](#)  
[instructions](#)  
[step 1](#)  
[step 2](#)  
[step 3](#)  
[step 4](#)  
[applet source code](#)

[Other NMR](#)  
[parameters:](#)  
[CP3](#)

Assignment of stereochemistry and structure using NMR and DP4

Please select version of database to use:  
☐ DP4-original  
☒ DP4-database2

Select probability distribution:  
☒ t distribution (recommended)  
☐ normal distribution

13C Calc:  
C1,C2,C3,C4,C5,C6,C9,C10,C11,C12,C16,C17,C18  
108.16,159.57,108.16,135.65,112.43,163.43,203.6  
107.97,159.78,108.45,135.77,112.4,163.42,203.56

1H Calc:  
H34,H35,H38,H39,H40,H41,H42,H43,H44,H45,H4  
5.73,6.41,2.86,2.71,2.05,2.16,2.48,4.68,1.04,1.09,1  
5.68,6.43,2.74,2.72,1.96,1.91,2.49,4.68,1.17,1.14,1

13C Expt:  
108.9(C1), 162.9(C2), 107.4(C3), 134.7(C4), 109.9

1H Expt:  
6.71(H34), 7.01(H35), 5.8(H38), 2.61(H39), 2.37(H

Results of DP4 using both carbon and proton data:  
Isomer 1: 86.6%  
Isomer 2: 13.4%

Results of DP4 using the carbon data only:  
Isomer 1: 58.3%  
Isomer 2: 41.7%

Results of DP4 using the proton data only:  
Isomer 1: 82.2%  
Isomer 2: 17.8%

(c) Jonathan M Goodman and Steven G Smith

[How to use this applet](#)

Assigning Stereochemistry to Single Diastereoisomers by GIAO NMR Calculation: The DP4 Probability  
S. G. Smith and J. M. Goodman *J. Am. Chem. Soc.* 2010, **132**, 12946-12959  
DOI: [10.1021/ja105035r](https://doi.org/10.1021/ja105035r)

|                      | 18R   | 18S   |
|----------------------|-------|-------|
| <sup>13</sup> C data | 58.3% | 41.7% |
| <sup>1</sup> H data  | 82.2% | 17.8% |
| Total                | 86.6% | 13.4% |

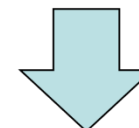

**NMR data match 86.6%**  
**18R configuration**

**Figure S23.** DP4 analysis of NMR calculation of Merochlorin J (4)

Results of DP4 using both carbon and proton data:

Isomer 1: 100.0%

Isomer 2: 0.0%

Isomer 3: 0.0%

Isomer 4: 0.0%

Results of DP4 using the carbon data only:

Isomer 1: 0.8%

Isomer 2: 10.4%

Isomer 3: 87.7%

Isomer 4: 1.1%

Results of DP4 using the proton data only:

Isomer 1: 100.0%

Isomer 2: 0.0%

Isomer 3: 0.0%

Isomer 4: 0.0%

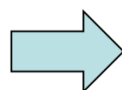

|                      | <b>15<i>R</i>,18<i>R</i></b> | <b>15<i>R</i>,18<i>S</i></b> | <b>15<i>S</i>,18<i>R</i></b> | <b>15<i>S</i>,18<i>S</i></b> |
|----------------------|------------------------------|------------------------------|------------------------------|------------------------------|
| <sup>13</sup> C data | 0.8%                         | 10.4%                        | 87.7%                        | 1.1%                         |
| <sup>1</sup> H data  | 100.0%                       | 0.0%                         | 0.0%                         | 0.0%                         |
| Total                | 100.0%                       | 0.0%                         | 0.0%                         | 0.0%                         |

Results of DP4 using both carbon and proton data:

Isomer 1: 100.0%

Isomer 2: 0.0%

Isomer 3: 0.0%

Isomer 4: 0.0%

Results of DP4 using the carbon data only:

Isomer 1: 2.8%

Isomer 2: 69.5%

Isomer 3: 26.9%

Isomer 4: 0.8%

Results of DP4 using the proton data only:

Isomer 1: 100.0%

Isomer 2: 0.0%

Isomer 3: 0.0%

Isomer 4: 0.0%

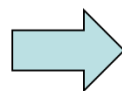

|                      | <b>15<i>R</i>,18<i>R</i></b> | <b>15<i>R</i>,18<i>S</i></b> | <b>15<i>S</i>,18<i>R</i></b> | <b>15<i>S</i>,18<i>S</i></b> |
|----------------------|------------------------------|------------------------------|------------------------------|------------------------------|
| <sup>13</sup> C data | 2.8%                         | 69.5%                        | 26.9%                        | 0.8%                         |
| <sup>1</sup> H data  | 100.0%                       | 0.0%                         | 0.0%                         | 0.0%                         |
| Total                | 100.0%                       | 0.0%                         | 0.0%                         | 0.0%                         |

Figure S24. LRMS spectrum of Merochlorins G (1)

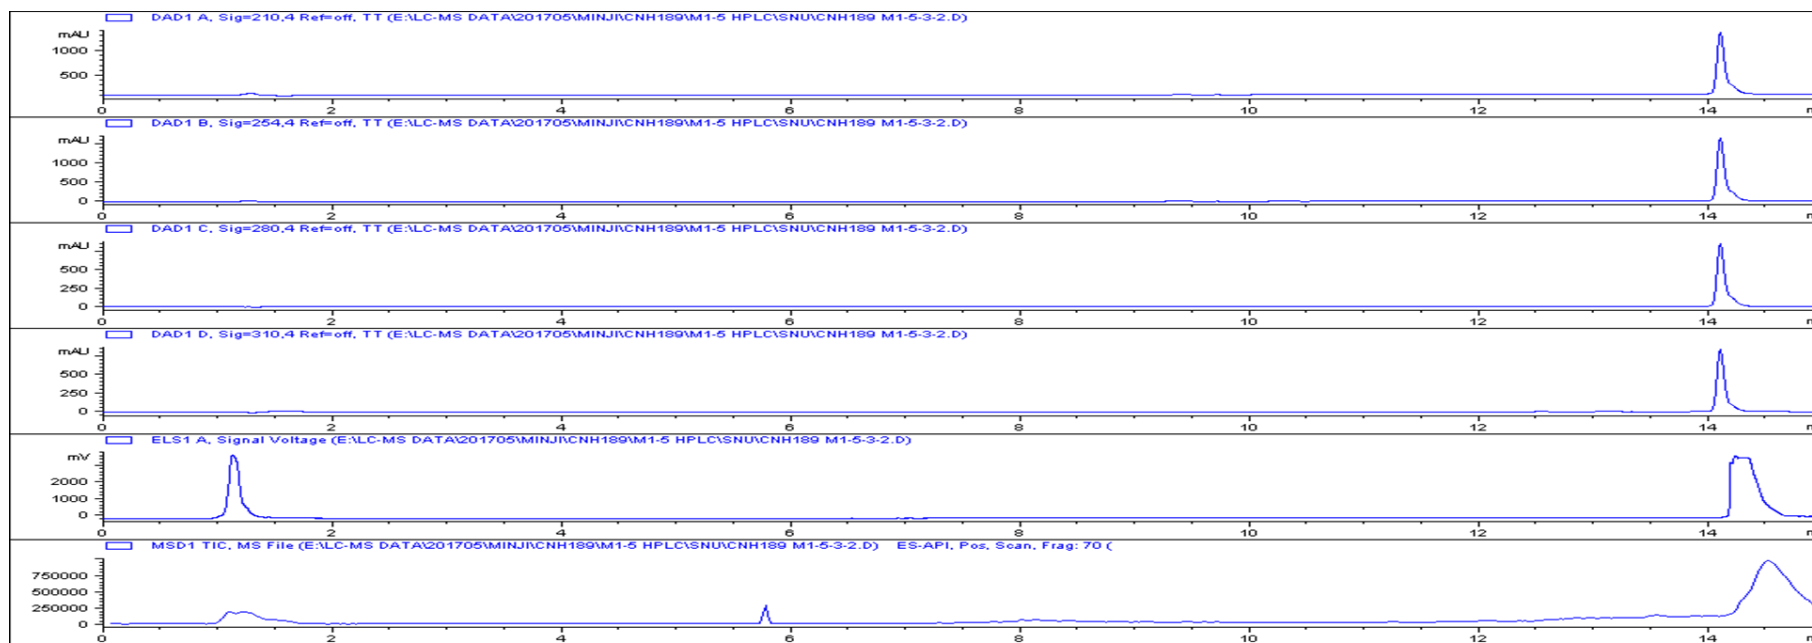

UV

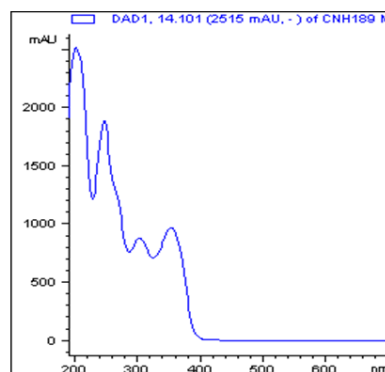

MS

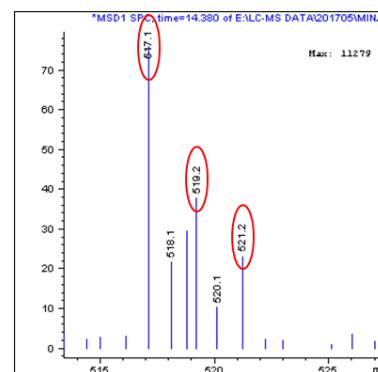

2 Cl ratio = 9:6:1

Figure S25. LRMS spectrum of Merochlorins H (2)

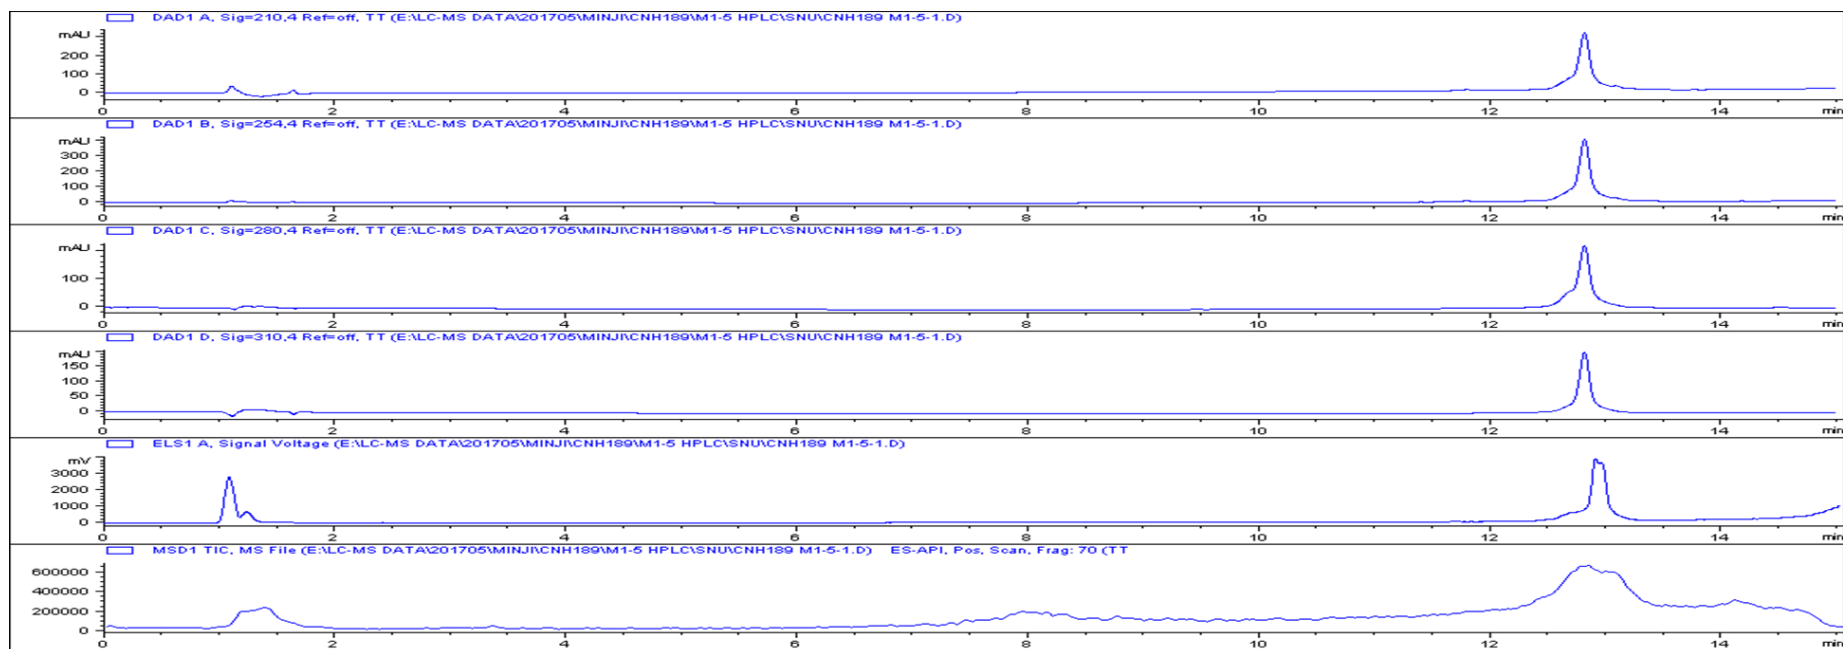

UV

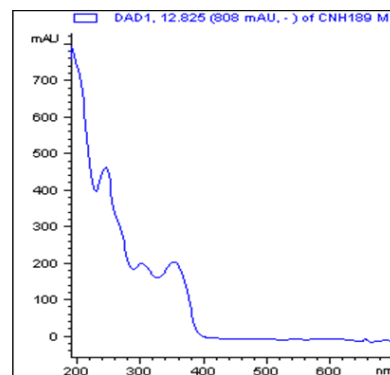

MS

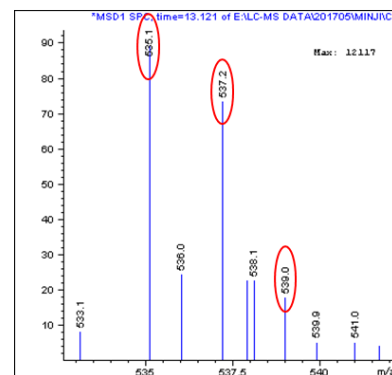

2 Cl ratio = 9:6:1

Figure S26. LRMS spectrum of Merochlorins I (3)

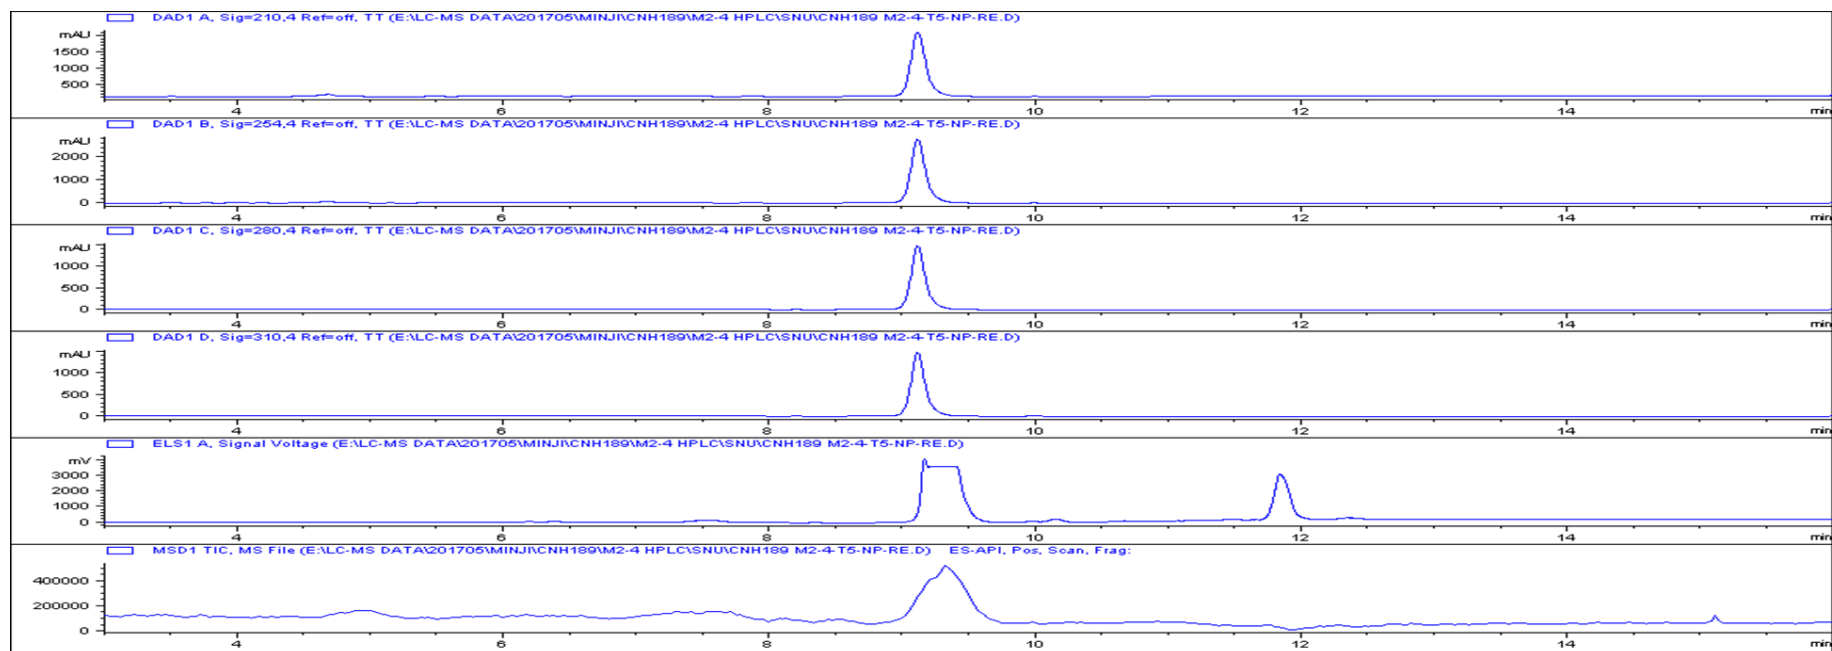

UV

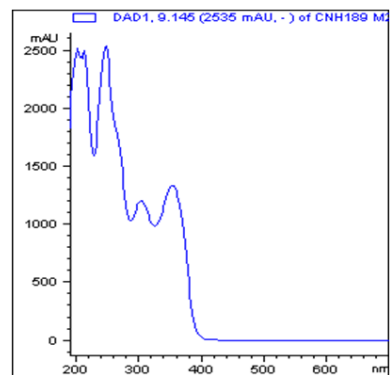

MS

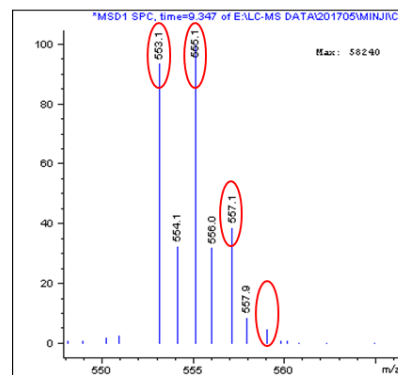

3 Cl ratio = 27:27:9:1

Figure S27. LRMS spectrum of Merochlorins J (4)

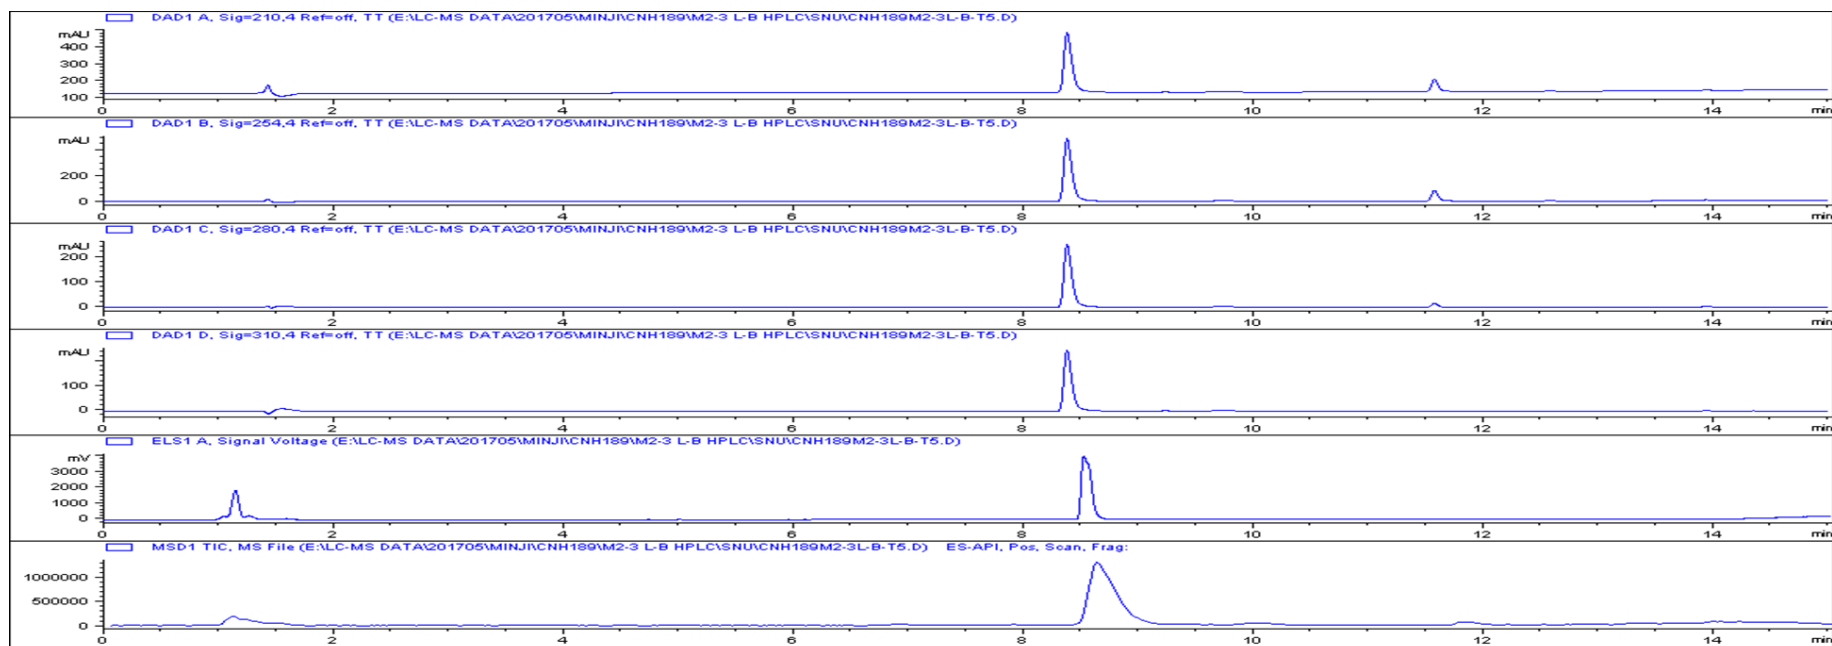

UV

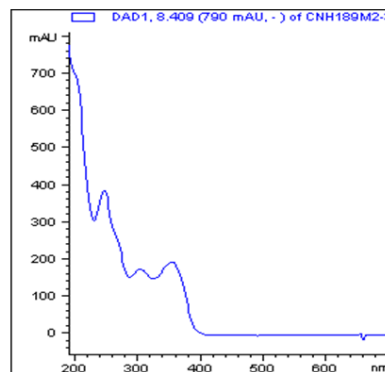

MS

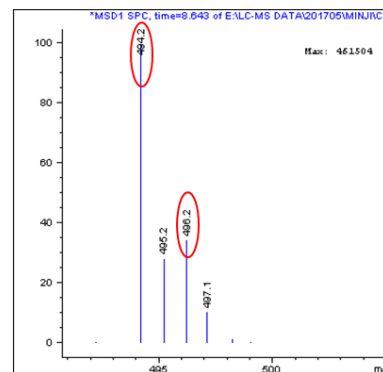

1 Cl ratio = 3:1

Figure S28. HRMS spectrum of Merochlorin G (1)

| [ Elemental Composition ]                                               |      |                |      | Date : 22-Feb-2018 14:22     |  | Page: 1 |
|-------------------------------------------------------------------------|------|----------------|------|------------------------------|--|---------|
| Data : FAB-Q485                                                         |      |                |      |                              |  |         |
| Sample: CNH189.494B                                                     |      |                |      |                              |  |         |
| Note : m-NBA                                                            |      |                |      |                              |  |         |
| Inlet : Direct                                                          |      |                |      | Ion Mode : FAB+              |  |         |
| RT : 2.70 min                                                           |      |                |      | Scan#: (121,130)             |  |         |
| Elements : C 100/0, H 100/0, Cl 3/1(35Cl 3/0, 37Cl 3/0), O 10/0, Na 1/0 |      |                |      |                              |  |         |
| Mass Tolerance : 20ppm, 5mmu if m/z < 250, 10mmu if m/z > 500           |      |                |      |                              |  |         |
| Unsaturation (U.S.) : -0.5 - 30.0                                       |      |                |      |                              |  |         |
| Observed m/z                                                            | Int% | Err[ppm / mmu] | U.S. | Composition                  |  |         |
| 517.1517                                                                | 2.9  | +5.3 / +2.8    | 21.5 | C 35 H 27 35Cl 2             |  |         |
|                                                                         |      | -3.8 / -2.0    | 26.5 | C 38 H 24 37Cl               |  |         |
|                                                                         |      | +11.1 / +5.8   | 13.5 | C 30 H 32 35Cl 37Cl 2 O      |  |         |
|                                                                         |      | +9.6 / +4.9    | 12.5 | C 29 H 32 35Cl 3 O 2         |  |         |
|                                                                         |      | +0.4 / +0.2    | 17.5 | C 32 H 29 35Cl 37Cl O 2      |  |         |
|                                                                         |      | -10.3 / -5.3   | 21.5 | C 34 H 26 35Cl O 3           |  |         |
|                                                                         |      | +6.2 / +3.2    | 9.5  | C 27 H 34 37Cl 3 O 3         |  |         |
|                                                                         |      | +4.7 / +2.4    | 8.5  | C 26 H 34 35Cl 2 37Cl O 4    |  |         |
|                                                                         |      | -4.5 / -2.3    | 13.5 | C 29 H 31 37Cl 2 O 4         |  |         |
|                                                                         |      | -6.0 / -3.1    | 12.5 | C 28 H 31 35Cl 2 O 5         |  |         |
|                                                                         |      | -15.2 / -7.8   | 17.5 | C 31 H 28 37Cl O 5           |  |         |
|                                                                         |      | +19.2 / +9.9   | 17.5 | C 30 H 26 35Cl O 6           |  |         |
|                                                                         |      | -0.2 / -0.1    | 4.5  | C 23 H 36 35Cl 37Cl 2 O 6    |  |         |
|                                                                         |      | -1.8 / -0.9    | 3.5  | C 22 H 36 35Cl 3 O 7         |  |         |
|                                                                         |      | -10.9 / -5.7   | 8.5  | C 25 H 33 35Cl 37Cl O 7      |  |         |
|                                                                         |      | +14.3 / +7.4   | 13.5 | C 27 H 28 37Cl O 8           |  |         |
|                                                                         |      | -5.1 / -2.6    | 0.5  | C 20 H 38 37Cl 3 O 8         |  |         |
|                                                                         |      | -6.7 / -3.5    | -0.5 | C 19 H 38 35Cl 2 37Cl O 9    |  |         |
|                                                                         |      | -15.8 / -8.2   | 4.5  | C 22 H 35 37Cl 2 O 9         |  |         |
|                                                                         |      | -17.4 / -9.0   | 3.5  | C 21 H 35 35Cl 2 O 10        |  |         |
|                                                                         |      | +18.6 / +9.6   | 4.5  | C 21 H 33 35Cl 37Cl O 10     |  |         |
|                                                                         |      | +10.0 / +5.2   | 18.5 | C 33 H 28 35Cl 2 Na          |  |         |
|                                                                         |      | +0.8 / +0.4    | 23.5 | C 36 H 25 37Cl Na            |  |         |
|                                                                         |      | -18.6 / -9.6   | 10.5 | C 29 H 35 37Cl 3 Na          |  |         |
|                                                                         |      | +15.8 / +8.2   | 10.5 | C 28 H 33 35Cl 37Cl 2 O Na   |  |         |
|                                                                         |      | +14.2 / +7.4   | 9.5  | C 27 H 33 35Cl 3 O 2 Na      |  |         |
|                                                                         |      | +5.1 / +2.6    | 14.5 | C 30 H 30 35Cl 37Cl O 2 Na   |  |         |
|                                                                         |      | -5.6 / -2.9    | 18.5 | C 32 H 27 35Cl O 3 Na        |  |         |
|                                                                         |      | +10.9 / +5.6   | 6.5  | C 25 H 35 37Cl 3 O 3 Na      |  |         |
|                                                                         |      | +9.3 / +4.8    | 5.5  | C 24 H 35 35Cl 2 37Cl O 4 Na |  |         |
|                                                                         |      | +0.2 / +0.1    | 10.5 | C 27 H 32 37Cl 2 O 4 Na      |  |         |
|                                                                         |      | -1.4 / -0.7    | 9.5  | C 26 H 32 35Cl 2 O 5 Na      |  |         |
|                                                                         |      | -10.5 / -5.4   | 14.5 | C 29 H 29 37Cl O 5 Na        |  |         |
|                                                                         |      | +4.4 / +2.3    | 1.5  | C 21 H 37 35Cl 37Cl 2 O 6 Na |  |         |
|                                                                         |      | +2.9 / +1.5    | 0.5  | C 20 H 37 35Cl 3 O 7 Na      |  |         |
|                                                                         |      | -6.3 / -3.2    | 5.5  | C 23 H 34 35Cl 37Cl O 7 Na   |  |         |
|                                                                         |      | -17.0 / -8.8   | 9.5  | C 25 H 31 35Cl O 8 Na        |  |         |
|                                                                         |      | +19.0 / +9.8   | 10.5 | C 25 H 29 37Cl O 8 Na        |  |         |
|                                                                         |      | -11.2 / -5.8   | 1.5  | C 20 H 36 37Cl 2 O 9 Na      |  |         |
|                                                                         |      | -12.7 / -6.6   | 0.5  | C 19 H 36 35Cl 2 O 10 Na     |  |         |



Figure S29. HRMS spectrum of Merochlorin H (2)

| [ Elemental Composition ]                                               |      |                |      | Date : 22-Feb-2018 14:08     |  | Page: 1 |
|-------------------------------------------------------------------------|------|----------------|------|------------------------------|--|---------|
| Data : FAB-Q484                                                         |      |                |      |                              |  |         |
| Sample: CNH189.512                                                      |      |                |      |                              |  |         |
| Note : m-NBA                                                            |      |                |      |                              |  |         |
| Inlet : Direct                                                          |      |                |      | Ion Mode : FAB+              |  |         |
| RT : 5.13 min                                                           |      |                |      | Scan#: (222,254)             |  |         |
| Elements : C 100/0, H 100/0, Cl 3/1(35Cl 3/0, 37Cl 3/0), O 10/0, Na 1/0 |      |                |      |                              |  |         |
| Mass Tolerance : 20ppm, 5mmu if m/z < 250, 10mmu if m/z > 500           |      |                |      |                              |  |         |
| Unsaturation (U.S.) : -0.5 - 30.0                                       |      |                |      |                              |  |         |
| Observed m/z                                                            | Int% | Err[ppm / mmu] | U.S. | Composition                  |  |         |
| 535.1627                                                                | 4.1  | -18.6 / -10.0  | 15.5 | C 33 H 34 35Cl 3             |  |         |
|                                                                         |      | +16.2 / +8.6   | 16.5 | C 33 H 32 35Cl 2 37Cl        |  |         |
|                                                                         |      | +7.3 / +3.9    | 21.5 | C 36 H 29 37Cl 2             |  |         |
|                                                                         |      | +5.8 / +3.1    | 20.5 | C 35 H 29 35Cl 2 O           |  |         |
|                                                                         |      | -3.0 / -1.6    | 25.5 | C 38 H 26 37Cl O             |  |         |
|                                                                         |      | +11.4 / +6.1   | 12.5 | C 30 H 34 35Cl 37Cl 2 O 2    |  |         |
|                                                                         |      | +9.9 / +5.3    | 11.5 | C 29 H 34 35Cl 3 O 3         |  |         |
|                                                                         |      | +1.1 / +0.6    | 16.5 | C 32 H 31 35Cl 37Cl O 3      |  |         |
|                                                                         |      | -9.3 / -5.0    | 20.5 | C 34 H 28 35Cl O 4           |  |         |
|                                                                         |      | +6.7 / +3.6    | 8.5  | C 27 H 36 37Cl 3 O 4         |  |         |
|                                                                         |      | +5.2 / +2.8    | 7.5  | C 26 H 36 35Cl 2 37Cl O 5    |  |         |
|                                                                         |      | -3.6 / -1.9    | 12.5 | C 29 H 33 37Cl 2 O 5         |  |         |
|                                                                         |      | -5.2 / -2.8    | 11.5 | C 28 H 33 35Cl 2 O 6         |  |         |
|                                                                         |      | -14.0 / -7.5   | 16.5 | C 31 H 30 37Cl O 6           |  |         |
|                                                                         |      | +0.5 / +0.2    | 3.5  | C 23 H 38 35Cl 37Cl 2 O 7    |  |         |
|                                                                         |      | -1.1 / -0.6    | 2.5  | C 22 H 38 35Cl 3 O 8         |  |         |
|                                                                         |      | -9.9 / -5.3    | 7.5  | C 25 H 35 35Cl 37Cl O 8      |  |         |
|                                                                         |      | +14.5 / +7.8   | 12.5 | C 27 H 30 37Cl O 9           |  |         |
|                                                                         |      | -4.3 / -2.3    | -0.5 | C 20 H 40 37Cl 3 O 9         |  |         |
|                                                                         |      | -14.6 / -7.8   | 3.5  | C 22 H 37 37Cl 2 O 10        |  |         |
|                                                                         |      | -14.1 / -7.5   | 12.5 | C 31 H 35 35Cl 3 Na          |  |         |
|                                                                         |      | +11.8 / +6.3   | 18.5 | C 34 H 30 37Cl 2 Na          |  |         |
|                                                                         |      | +10.3 / +5.5   | 17.5 | C 33 H 30 35Cl 2 O Na        |  |         |
|                                                                         |      | +1.5 / +0.8    | 22.5 | C 36 H 27 37Cl O Na          |  |         |
|                                                                         |      | -17.3 / -9.3   | 9.5  | C 29 H 37 37Cl 3 O Na        |  |         |
|                                                                         |      | +15.9 / +8.5   | 9.5  | C 28 H 35 35Cl 37Cl 2 O 2 Na |  |         |
|                                                                         |      | +14.4 / +7.7   | 8.5  | C 27 H 35 35Cl 3 O 3 Na      |  |         |
|                                                                         |      | +5.6 / +3.0    | 13.5 | C 30 H 32 35Cl 37Cl O 3 Na   |  |         |
|                                                                         |      | -4.8 / -2.5    | 17.5 | C 32 H 29 35Cl O 4 Na        |  |         |
|                                                                         |      | +11.2 / +6.0   | 5.5  | C 25 H 37 37Cl 3 O 4 Na      |  |         |
|                                                                         |      | +9.7 / +5.2    | 4.5  | C 24 H 37 35Cl 2 37Cl O 5 Na |  |         |
|                                                                         |      | +0.9 / +0.5    | 9.5  | C 27 H 34 37Cl 2 O 5 Na      |  |         |
|                                                                         |      | -0.7 / -0.4    | 8.5  | C 26 H 34 35Cl 2 O 6 Na      |  |         |
|                                                                         |      | -9.5 / -5.1    | 13.5 | C 29 H 31 37Cl O 6 Na        |  |         |
|                                                                         |      | +5.0 / +2.7    | 0.5  | C 21 H 39 35Cl 37Cl 2 O 7 Na |  |         |
|                                                                         |      | +3.4 / +1.8    | -0.5 | C 20 H 39 35Cl 3 O 8 Na      |  |         |
|                                                                         |      | -5.4 / -2.9    | 4.5  | C 23 H 36 35Cl 37Cl O 8 Na   |  |         |
|                                                                         |      | -15.7 / -8.4   | 8.5  | C 25 H 33 35Cl O 9 Na        |  |         |
|                                                                         |      | -10.1 / -5.4   | 0.5  | C 20 H 38 37Cl 2 O 10 Na     |  |         |

Figure S30. HRMS spectrum of Merochlorin I (3)

Page: 1

```

[ Elemental Composition ]
Data : FAB-Q995
Sample: CNH189 M2-4 T5
Note : m-NBA
Inlet : Direct
RT : 4.16 min
Elements : C 100/0, H 100/0, Cl 4/2(35Cl 4/0, 37Cl 4/0), O 10/0, Na 1/0
Mass Tolerance : 20ppm, 5mmu if m/z < 250, 10mmu if m/z > 500
Unsaturation (U.S.) : -0.5 - 50.0
Date : 15-Jun-2018 18:12
Ion Mode : FAB+
Scan#: (181,205)

```

| Observed m/z | Int% | Err[ppm / mmu] | U.S. | Composition                    |
|--------------|------|----------------|------|--------------------------------|
| 553.1281     | 0.6  | +4.3 / +2.4    | 20.5 | C 35 H 28 35Cl 3               |
|              |      | -4.2 / -2.3    | 25.5 | C 38 H 25 35Cl 37Cl            |
|              |      | +11.2 / +6.2   | 13.5 | C 31 H 33 37Cl 4               |
|              |      | +9.8 / +5.4    | 12.5 | C 30 H 33 35Cl 2 37Cl 2 O      |
|              |      | +1.2 / +0.7    | 17.5 | C 33 H 30 37Cl 3 O             |
|              |      | +8.3 / +4.6    | 11.5 | C 29 H 33 35Cl 4 O 2           |
|              |      | -0.2 / -0.1    | 16.5 | C 32 H 30 35Cl 2 37Cl O 2      |
|              |      | -8.8 / -4.9    | 21.5 | C 35 H 27 37Cl 2 O 2           |
|              |      | -10.3 / -5.7   | 20.5 | C 34 H 27 35Cl 2 O 3           |
|              |      | +5.2 / +2.9    | 8.5  | C 27 H 35 35Cl 37Cl 3 O 3      |
|              |      | +3.7 / +2.1    | 7.5  | C 26 H 35 35Cl 3 37Cl O 4      |
|              |      | -4.8 / -2.7    | 12.5 | C 29 H 32 35Cl 37Cl 2 O 4      |
|              |      | -6.3 / -3.5    | 11.5 | C 28 H 32 35Cl 3 O 5           |
|              |      | -14.8 / -8.2   | 16.5 | C 31 H 29 35Cl 37Cl O 5        |
|              |      | +0.6 / +0.3    | 4.5  | C 24 H 37 37Cl 4 O 5           |
|              |      | +17.3 / +9.6   | 16.5 | C 30 H 27 35Cl 2 O 6           |
|              |      | -0.9 / -0.5    | 3.5  | C 23 H 37 35Cl 2 37Cl 2 O 6    |
|              |      | -9.4 / -5.2    | 8.5  | C 26 H 34 37Cl 3 O 6           |
|              |      | -2.3 / -1.3    | 2.5  | C 22 H 37 35Cl 4 O 7           |
|              |      | -10.9 / -6.0   | 7.5  | C 25 H 34 35Cl 2 37Cl O 7      |
|              |      | +12.8 / +7.1   | 12.5 | C 27 H 29 35Cl 37Cl O 8        |
|              |      | -5.4 / -3.0    | -0.5 | C 20 H 39 35Cl 37Cl 3 O 8      |
|              |      | -15.4 / -8.5   | 3.5  | C 22 H 36 35Cl 37Cl 2 O 9      |
|              |      | -16.9 / -9.4   | 2.5  | C 21 H 36 35Cl 3 O 10          |
|              |      | +16.7 / +9.2   | 3.5  | C 21 H 34 35Cl 2 37Cl O 10     |
|              |      | +8.2 / +4.5    | 8.5  | C 24 H 31 37Cl 2 O 10          |
|              |      | +8.7 / +4.8    | 17.5 | C 33 H 29 35Cl 3 Na            |
|              |      | +0.1 / +0.1    | 22.5 | C 36 H 26 35Cl 37Cl Na         |
|              |      | -18.0 / -10.0  | 9.5  | C 29 H 36 35Cl 37Cl 3 Na       |
|              |      | +15.6 / +8.6   | 10.5 | C 29 H 34 37Cl 4 Na            |
|              |      | +14.1 / +7.8   | 9.5  | C 28 H 34 35Cl 2 37Cl 2 O Na   |
|              |      | +5.6 / +3.1    | 14.5 | C 31 H 31 37Cl 3 O Na          |
|              |      | +12.6 / +7.0   | 8.5  | C 27 H 34 35Cl 4 O 2 Na        |
|              |      | +4.1 / +2.3    | 13.5 | C 30 H 31 35Cl 2 37Cl O 2 Na   |
|              |      | -4.4 / -2.5    | 18.5 | C 33 H 28 37Cl 2 O 2 Na        |
|              |      | -5.9 / -3.3    | 17.5 | C 32 H 28 35Cl 2 O 3 Na        |
|              |      | +9.5 / +5.3    | 5.5  | C 25 H 36 35Cl 37Cl 3 O 3 Na   |
|              |      | +8.1 / +4.5    | 4.5  | C 24 H 36 35Cl 3 37Cl O 4 Na   |
|              |      | -0.5 / -0.3    | 9.5  | C 27 H 33 35Cl 37Cl 2 O 4 Na   |
|              |      | -1.9 / -1.1    | 8.5  | C 26 H 33 35Cl 3 O 5 Na        |
|              |      | -10.5 / -5.8   | 13.5 | C 29 H 30 35Cl 37Cl O 5 Na     |
|              |      | +5.0 / +2.7    | 1.5  | C 22 H 38 37Cl 4 O 5 Na        |
|              |      | +3.5 / +1.9    | 0.5  | C 21 H 38 35Cl 2 37Cl 2 O 6 Na |
|              |      | -5.0 / -2.8    | 5.5  | C 24 H 35 37Cl 3 O 6 Na        |
|              |      | +2.0 / +1.1    | -0.5 | C 20 H 38 35Cl 4 O 7 Na        |
|              |      | -6.5 / -3.6    | 4.5  | C 23 H 35 35Cl 2 37Cl O 7 Na   |
|              |      | -15.1 / -8.3   | 9.5  | C 26 H 32 37Cl 2 O 7 Na        |
|              |      | -16.5 / -9.1   | 8.5  | C 25 H 32 35Cl 2 O 8 Na        |
|              |      | +17.1 / +9.5   | 9.5  | C 25 H 30 35Cl 37Cl O 8 Na     |
|              |      | -11.1 / -6.1   | 0.5  | C 20 H 37 35Cl 37Cl 2 O 9 Na   |
|              |      | -12.6 / -6.9   | -0.5 | C 19 H 37 35Cl 3 O 10 Na       |
|              |      | +12.5 / +6.9   | 5.5  | C 22 H 32 37Cl 2 O 10 Na       |

Figure S31. HRMS spectrum of Merochlorin J (4)

[ Elemental Composition ]  
 Date : 03-Apr-2018 13:20  
 Sample: CNH189.493-T4  
 Note : m-NBA  
 Inlet : Direct  
 RT : 0.82 min  
 Elements : C 100/0, H 100/0, Cl 2/0(35Cl 2/0, 37Cl 2/0), N 10/0, O 10/0  
 Mass Tolerance : 20ppm, 5mmu if m/z < 250, 10mmu if m/z > 500  
 Unsaturation (U.S.) : 5.0 - 20.0

Ion Mode : FAB+  
 Scan#: (26,51)

| Observed m/z | Int%  | Err(ppm / mmu) | U.S. | Composition                  |
|--------------|-------|----------------|------|------------------------------|
| 494.2311     | 100.0 | -2.1 / -1.0    | 13.0 | C 32 H 38 35Cl 37Cl          |
|              |       | -14.3 / -7.1   | 12.5 | C 31 H 38 35Cl 2 N           |
|              |       | +11.2 / +5.5   | 13.0 | C 30 H 36 35Cl 2 N 2         |
|              |       | +1.6 / +0.8    | 18.0 | C 33 H 33 37Cl N 2           |
|              |       | -10.6 / -5.2   | 17.5 | C 32 H 33 35Cl N 3           |
|              |       | +14.9 / +7.4   | 18.0 | C 31 H 31 35Cl N 4           |
|              |       | -1.8 / -0.9    | 10.0 | C 25 H 36 37Cl 2 N 6         |
|              |       | -14.0 / -6.9   | 9.5  | C 24 H 36 35Cl 37Cl N 7      |
|              |       | +11.5 / +5.7   | 10.0 | C 23 H 34 35Cl 37Cl N 8      |
|              |       | -0.7 / -0.3    | 9.5  | C 22 H 34 35Cl 2 N 9         |
|              |       | -10.2 / -5.1   | 14.5 | C 25 H 31 37Cl N 9           |
|              |       | +15.2 / +7.5   | 15.0 | C 24 H 29 37Cl N 10          |
|              |       | -13.3 / -6.6   | 17.0 | C 34 H 35 35Cl O             |
|              |       | +12.2 / +6.0   | 17.5 | C 33 H 33 35Cl N O           |
|              |       | -4.5 / -2.2    | 9.5  | C 27 H 38 37Cl 2 N 3 O       |
|              |       | -16.7 / -8.2   | 9.0  | C 26 H 38 35Cl 37Cl N 4 O    |
|              |       | +8.8 / +4.3    | 9.5  | C 25 H 36 35Cl 37Cl N 5 O    |
|              |       | -3.4 / -1.7    | 9.0  | C 24 H 36 35Cl 2 N 6 O       |
|              |       | -13.0 / -6.4   | 14.0 | C 27 H 33 37Cl N 6 O         |
|              |       | +12.5 / +6.2   | 14.5 | C 26 H 31 37Cl N 7 O         |
|              |       | +0.3 / +0.1    | 14.0 | C 25 H 31 35Cl N 8 O         |
|              |       | +4.0 / +2.0    | 19.0 | C 26 H 26 N 10 O             |
|              |       | -16.4 / -8.1   | 6.0  | C 19 H 36 37Cl 2 N 10 O      |
|              |       | -7.2 / -3.6    | 9.0  | C 29 H 40 37Cl 2 O 2         |
|              |       | -19.4 / -9.6   | 8.5  | C 28 H 40 35Cl 37Cl N O 2    |
|              |       | +18.2 / +9.0   | 9.5  | C 28 H 38 37Cl 2 N O 2       |
|              |       | +6.1 / +3.0    | 9.0  | C 27 H 38 35Cl 37Cl N 2 O 2  |
|              |       | -6.1 / -3.0    | 8.5  | C 26 H 38 35Cl 2 N 3 O 2     |
|              |       | -15.7 / -7.8   | 13.5 | C 29 H 35 37Cl N 3 O 2       |
|              |       | +19.3 / +9.5   | 9.0  | C 25 H 36 35Cl 2 N 4 O 2     |
|              |       | +9.8 / +4.8    | 14.0 | C 28 H 33 37Cl N 4 O 2       |
|              |       | -2.4 / -1.2    | 13.5 | C 27 H 33 35Cl N 5 O 2       |
|              |       | +11.3 / +0.6   | 18.5 | C 28 H 28 N 7 O 2            |
|              |       | -19.1 / -9.4   | 5.5  | C 21 H 38 37Cl 2 N 7 O 2     |
|              |       | +6.4 / +3.2    | 6.0  | C 20 H 36 37Cl 2 N 8 O 2     |
|              |       | -5.8 / -2.9    | 5.5  | C 19 H 36 35Cl 37Cl N 9 O 2  |
|              |       | -18.0 / -8.9   | 5.0  | C 18 H 36 35Cl 2 N 10 O 2    |
|              |       | +19.6 / +9.7   | 6.0  | C 18 H 34 35Cl 37Cl N 10 O 2 |
|              |       | -8.8 / -4.4    | 8.0  | C 28 H 40 35Cl 2 O 3         |
|              |       | -18.4 / -9.1   | 13.0 | C 31 H 37 37Cl O 3           |
|              |       | +16.6 / +8.2   | 8.5  | C 27 H 38 35Cl 2 N O 3       |
|              |       | +7.0 / +3.5    | 13.5 | C 30 H 35 37Cl N O 3         |
|              |       | -5.1 / -2.5    | 13.0 | C 29 H 35 35Cl N 2 O 3       |
|              |       | -1.4 / -0.7    | 18.0 | C 30 H 30 N 4 O 3            |
|              |       | +3.7 / +1.8    | 5.5  | C 22 H 38 37Cl 2 N 5 O 3     |
|              |       | -8.5 / -4.2    | 5.0  | C 21 H 38 35Cl 37Cl N 6 O 3  |
|              |       | +16.9 / +8.4   | 5.5  | C 20 H 36 35Cl 37Cl N 7 O 3  |
|              |       | +4.7 / +2.3    | 5.0  | C 19 H 36 35Cl 2 N 8 O 3     |
|              |       | -4.8 / -2.4    | 10.0 | C 22 H 33 37Cl N 8 O 3       |
|              |       | -17.0 / -8.4   | 9.5  | C 21 H 33 35Cl N 9 O 3       |
|              |       | +8.4 / +4.2    | 10.0 | C 20 H 31 35Cl N 10 O 3      |
|              |       | +17.6 / +8.7   | 13.0 | C 30 H 35 35Cl O 4           |
|              |       | -4.2 / -2.1    | 17.5 | C 32 H 32 N O 4              |
|              |       | +0.9 / +0.5    | 5.0  | C 24 H 40 37Cl 2 N 2 O 4     |
|              |       | +14.2 / +7.0   | 5.0  | C 22 H 38 35Cl 37Cl N 4 O 4  |

Page: 1

[ Elemental Composition ]

|              |      |                         |
|--------------|------|-------------------------|
| -7.5 / -3.7  | 9.5  | C 24 H 35 37Cl N 5 O 4  |
| -19.7 / -9.8 | 9.0  | C 23 H 35 35Cl N 6 O 4  |
| +17.9 / +8.8 | 10.0 | C 23 H 33 37Cl N 6 O 4  |
| +5.7 / +2.8  | 9.5  | C 22 H 33 35Cl N 7 O 4  |
| -16.0 / -7.9 | 14.0 | C 24 H 30 N 8 O 4       |
| +9.4 / +4.7  | 14.5 | C 23 H 28 N 9 O 4       |
| -10.3 / -5.1 | 9.0  | C 26 H 37 37Cl N 2 O 5  |
| +15.2 / +7.5 | 9.5  | C 25 H 35 37Cl N 3 O 5  |
| +3.0 / +1.5  | 9.0  | C 24 H 35 35Cl N 4 O 5  |
| -18.7 / -9.3 | 13.5 | C 26 H 32 N 5 O 5       |
| +6.7 / +3.3  | 14.0 | C 25 H 30 N 6 O 5       |
| +3.3 / +1.6  | 6.0  | C 17 H 33 37Cl N 10 O 5 |
| +12.5 / +6.2 | 9.0  | C 27 H 37 37Cl O 6      |
| +0.3 / +0.1  | 8.5  | C 26 H 37 35Cl N O 6    |
| +4.0 / +2.0  | 13.5 | C 27 H 32 N 3 O 6       |
| +0.6 / +0.3  | 5.5  | C 19 H 35 37Cl N 7 O 6  |
| -11.6 / -5.7 | 5.0  | C 18 H 35 35Cl N 8 O 6  |
| +13.9 / +6.8 | 5.5  | C 17 H 33 35Cl N 9 O 6  |
| -7.9 / -3.9  | 10.0 | C 19 H 30 N 10 O 6      |
| +1.3 / +0.6  | 13.0 | C 29 H 34 O 7           |
| -2.1 / -1.0  | 5.0  | C 21 H 37 37Cl N 4 O 7  |
| +11.1 / +5.5 | 5.0  | C 19 H 35 35Cl N 6 O 7  |
| -10.6 / -5.2 | 9.5  | C 21 H 32 N 7 O 7       |
| +14.8 / +7.3 | 10.0 | C 20 H 30 N 8 O 7       |
| -13.3 / -6.6 | 9.0  | C 23 H 34 N 4 O 8       |
| +12.1 / +6.0 | 9.5  | C 22 H 32 N 5 O 8       |
| -16.0 / -7.9 | 8.5  | C 25 H 36 N O 9         |
| +9.4 / +4.6  | 9.0  | C 24 H 34 N 2 O 9       |
| -2.5 / -1.2  | 5.5  | C 16 H 32 N 9 O 9       |
| -5.2 / -2.6  | 5.0  | C 18 H 34 N 6 O 10      |

Page: 2

Figure S32. HRMS spectrum of Compound 10

[ Mass Spectrum ]

Date : EI-A768 Date : 25-May-2021 14:53

RT : 1.03 min Scan# : (51,60)

Elements : C 100/0, H 100/0, O 10/0

Mass Tolerance : 10ppm, 5mmu if  $m/z < 500$ , 10mmu if  $m/z > 1000$

Unsaturation (U.S.) : -0.5 - 20.0

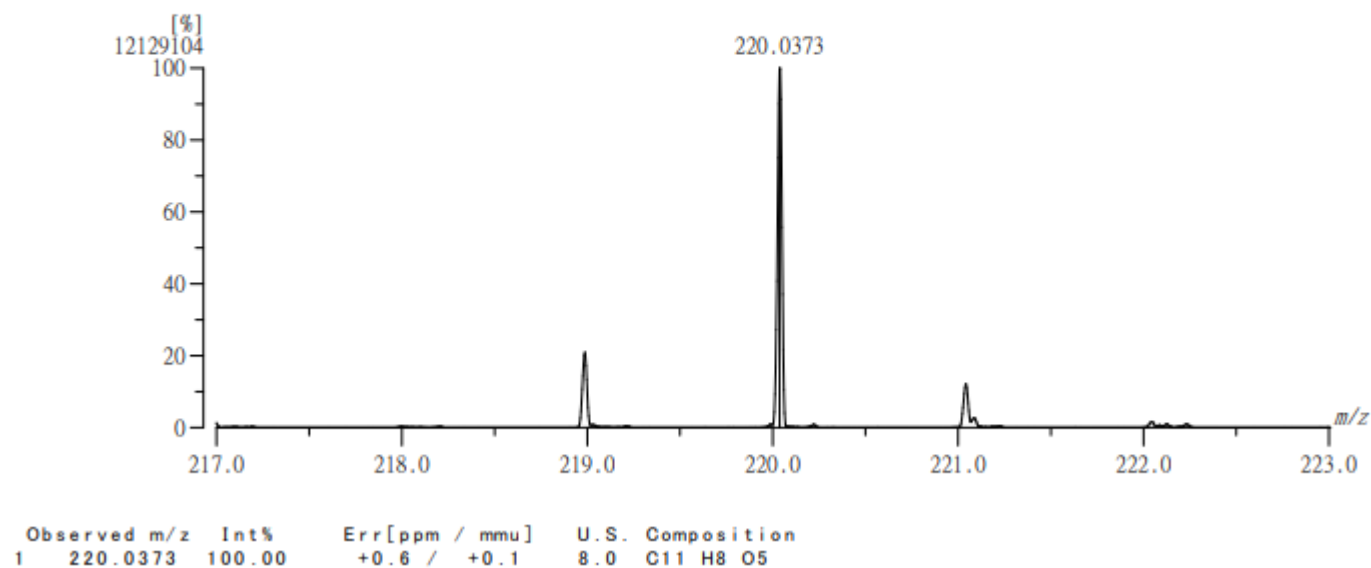

**Figure S33.** Simulated conformer models of two possible diastereomers of **1** (18*R*, 18*S*)

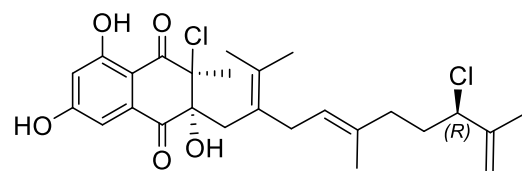

Diastereomer 1 (18*R*)

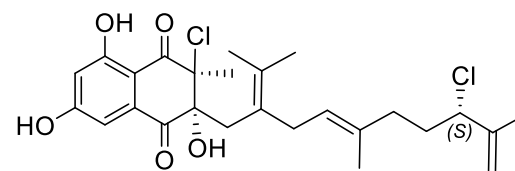

Diastereomer 2 (18*S*)

**Figure S34.** Simulated conformer models of four possible diastereomers of **4** (15*R*/18*R*, 15*R*/18*S*, 15*S*/18*R*, and 15*S*/18*S*)

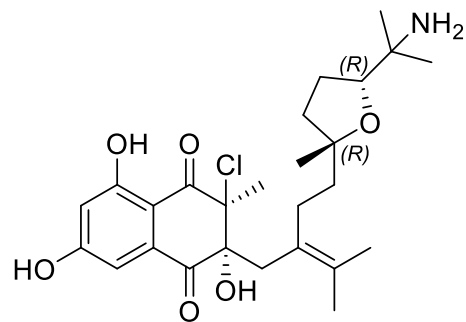

Diastereomer 1 (15*R*/18*R*)

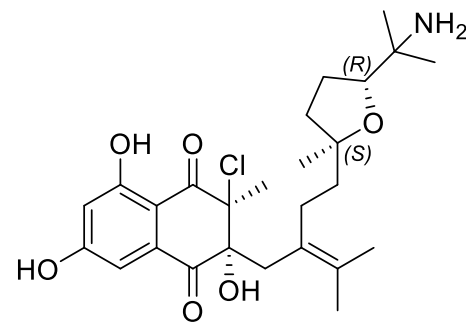

Diastereomer 2 (15*R*/18*S*)

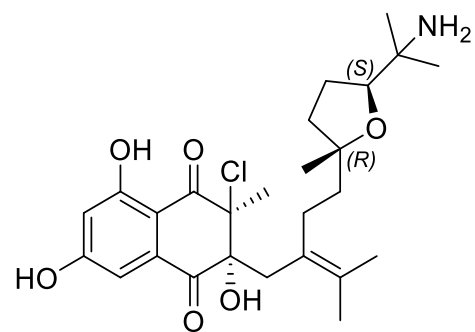

Diastereomer 3 (15*S*/18*R*)

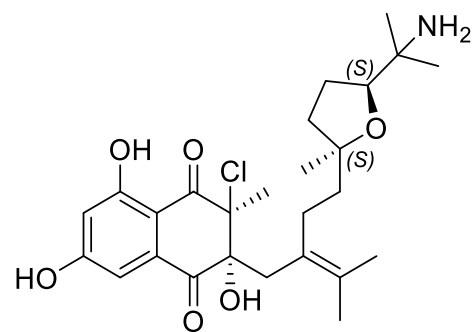

Diastereomer 4 (15*S*/18*S*)

**Table S1.** Experimental (Exp.) and calculated (Cal.) chemical shift values (CS,  $\delta$ ) of merochlorin G (**1**)

| Number | Atom | calculated 18 <i>R</i> | calculated 18 <i>S</i> | experimental |
|--------|------|------------------------|------------------------|--------------|
| 1      | c    | 108.16                 | 107.97                 | 108.9        |
| 2      | c    | 159.57                 | 159.78                 | 162.9        |
| 3      | c    | 108.16                 | 108.45                 | 107.4        |
| 4      | c    | 135.65                 | 135.77                 | 134.7        |
| 5      | c    | 112.43                 | 112.4                  | 109.9        |
| 6      | c    | 163.43                 | 163.42                 | 165.3        |
| 9      | c    | 203.67                 | 203.5                  | 195.1        |
| 10     | c    | 89.71                  | 89.48                  | 84           |
| 11     | c    | 86.76                  | 86.36                  | 74.5         |
| 12     | c    | 200.54                 | 201.1                  | 194.7        |
| 16     | c    | 47.96                  | 47.54                  | 38.6         |
| 17     | c    | 132.19                 | 132.08                 | 131.6        |
| 18     | c    | 38.26                  | 38.4                   | 31.3         |
| 19     | c    | 130.26                 | 130.52                 | 123.5        |
| 20     | c    | 137.59                 | 138.27                 | 134          |
| 22     | c    | 137.66                 | 138.47                 | 125.1        |
| 23     | c    | 25.3                   | 25.26                  | 20.6         |
| 24     | c    | 25.52                  | 25.6                   | 20.9         |
| 25     | c    | 42.54                  | 43.81                  | 36.6         |
| 26     | c    | 20.92                  | 20.27                  | 18.1         |
| 27     | c    | 38.71                  | 39.35                  | 34.8         |
| 28     | c    | 65.66                  | 66.75                  | 66.4         |
| 29     | c    | 148.71                 | 149.75                 | 144.3        |

|    |   |        |        |       |
|----|---|--------|--------|-------|
| 30 | c | 26.11  | 25.65  | 17    |
| 32 | c | 116.44 | 116.23 | 114.2 |
| 33 | c | 31.86  | 31.99  | 15.9  |

**Table S2.** Experimental (Exp.) and calculated (Cal.) chemical shift values (CS,  $\delta$ ) of merochlorin J (**4**)

| Number | Atom | 15 <i>R</i> /18 <i>R</i> | 15 <i>R</i> /18 <i>S</i> | 15 <i>S</i> /18 <i>R</i> | 15 <i>S</i> /18 <i>S</i> | experimental |
|--------|------|--------------------------|--------------------------|--------------------------|--------------------------|--------------|
| 1      | c    | 112.9                    | 113.67                   | 111.18                   | 113.16                   | 107.7        |
| 2      | c    | 165.02                   | 163.53                   | 165.74                   | 165.26                   | 164.1        |
| 3      | c    | 110.42                   | 113.85                   | 108.91                   | 109.53                   | 107.2        |
| 4      | c    | 135.27                   | 135.75                   | 135.7                    | 135.54                   | 134.9        |
| 5      | c    | 110.41                   | 111.33                   | 109.25                   | 110.05                   | 107.8        |
| 6      | c    | 166.57                   | 163.95                   | 166.75                   | 166.66                   | 165.2        |
| 7      | c    | 203.08                   | 203.22                   | 203.88                   | 202.65                   | 195.3        |
| 8      | c    | 88.89                    | 89.23                    | 88.6                     | 89.18                    | 84           |
| 9      | c    | 91.95                    | 87.46                    | 92.44                    | 91.74                    | 76.1         |
| 10     | c    | 197.14                   | 199.27                   | 197.43                   | 197.46                   | 193.6        |
| 15     | c    | 35.16                    | 33.01                    | 33.85                    | 34.79                    | 18.1         |
| 17     | c    | 48.89                    | 48.77                    | 44.52                    | 48.75                    | 37.9         |
| 18     | c    | 130.88                   | 132.69                   | 131.53                   | 130.58                   | 126.4        |
| 20     | c    | 140.95                   | 139.64                   | 140.77                   | 140.89                   | 129.2        |
| 21     | c    | 35.26                    | 34.4                     | 33.55                    | 35.31                    | 26.3         |
| 22     | c    | 26.89                    | 25.88                    | 26.16                    | 27.14                    | 20           |



|    |   |       |       |       |       |      |
|----|---|-------|-------|-------|-------|------|
| 23 | c | 28.69 | 27.65 | 27.08 | 28.8  | 20   |
| 24 | c | 45.84 | 45.39 | 47.81 | 46.01 | 39.7 |
| 25 | c | 85.48 | 84.72 | 86.23 | 85.87 | 83.4 |
| 27 | c | 88.78 | 88.85 | 87.2  | 88.08 | 81   |
| 28 | c | 33.45 | 31.99 | 33.48 | 31.36 | 25.9 |
| 29 | c | 40.48 | 38.69 | 47.77 | 42.57 | 36.3 |
| 30 | c | 34.35 | 35.84 | 33.14 | 31.59 | 24.7 |
| 31 | c | 56.02 | 56.17 | 56.78 | 56.55 | 55.5 |
| 32 | c | 35.05 | 32.38 | 31.62 | 36.4  | 19.7 |
| 33 | c | 30.62 | 31.58 | 31.68 | 29.91 | 22.8 |
| 35 | h | 5.98  | 5.95  | 6.05  | 6.12  | 6.62 |
| 36 | h | 6.42  | 6.54  | 6.21  | 6.12  | 6.81 |
| 39 | h | 0.76  | 0.73  | 0.77  | 0.82  | 1.81 |
| 40 | h | 1.39  | 1.25  | 1.45  | 1.35  | 1.81 |
| 41 | h | 2.33  | 2.13  | 2.29  | 2.29  | 1.81 |
| 42 | h | 3.22  | 3.24  | 3.28  | 3.32  | 2.45 |
| 43 | h | 1.9   | 1.59  | 1.69  | 1.51  | 2.31 |
| 44 | h | 2.99  | 2.6   | 2.98  | 3.04  | 6.16 |
| 45 | h | 1.25  | 0.99  | 1.34  | 0.9   | 2.23 |
| 46 | h | 1.71  | 1.56  | 1.98  | 2.04  | 1.65 |
| 47 | h | 1.35  | 1.43  | 1.45  | 1.65  | 1.05 |
| 48 | h | 1.6   | 1.26  | 1.17  | 1.4   | 1.05 |
| 49 | h | 1.43  | 1.11  | 1.7   | 1.49  | 1.05 |
| 50 | h | 2.02  | 2.18  | 2.54  | 1.47  | 1.47 |

|    |   |      |      |      |      |      |
|----|---|------|------|------|------|------|
| 51 | h | 1.32 | 1.09 | 1.21 | 1.76 | 1.47 |
| 52 | h | 1.67 | 1.28 | 1.28 | 1.91 | 1.47 |
| 53 | h | 1.12 | 0.93 | 0.94 | 1.33 | 1.42 |
| 54 | h | 1.31 | 1.07 | 0.96 | 0.89 | 1.17 |
| 55 | h | 3.4  | 3.69 | 3.62 | 3.53 | 3.98 |
| 56 | h | 1.55 | 1.38 | 1.32 | 1.65 | 1.88 |
| 57 | h | 1.36 | 1.25 | 1.35 | 1.4  | 1.64 |
| 58 | h | 1.33 | 1.11 | 1.54 | 1.19 | 1.56 |
| 59 | h | 1.73 | 1.67 | 1.4  | 0.96 | 1.56 |
| 60 | h | 0.86 | 0.77 | 0.62 | 0.64 | 1.06 |
| 61 | h | 1.3  | 0.87 | 1.01 | 1.26 | 1.06 |
| 62 | h | 0.8  | 0.5  | 1.33 | 1.03 | 1.06 |
| 63 | h | 1.22 | 0.71 | 0.87 | 0.99 | 1.14 |
| 64 | h | 0.99 | 1.08 | 1.48 | 1.28 | 1.14 |
| 65 | h | 0.92 | 0.63 | 0.82 | 0.99 | 1.14 |
| 66 | h | 1.15 | 0.34 | 0.6  | 1.06 | 1.16 |
| 67 | h | 1.31 | 1.26 | 1.41 | 1.04 | 1.16 |
| 68 | h | 0.95 | 0.83 | 1.05 | 0.72 | 1.16 |
